# Supplementary material
Source: PubMed Central journal article supplement (PMC3095692)
Supplement: NIHMS281323-supplement-01.pdf [file NIHMS281323-supplement-01.pdf]

**Supplementary Table.** Differential expression of genes associated with GCN5 knockdown.

Genes shown are all significant after adjusting the p-values for multiple testing based on the false discovery rate method (adjusted  $p < 0.10$ ). Genes that were differentially regulated by GCN5 silencing [T vs NT] and were range of  $\geq 1.5$  fold to  $\leq 2.5$  fold only, are shown in this table.

| Gene Symbol | Fold change | logFC    | AveExpr | t     | P.Value  | adj.P.Val | Prob of Diff Ex | Pubmed ID |
|-------------|-------------|----------|---------|-------|----------|-----------|-----------------|-----------|
| FYCO1       | 2.49        | 1.318946 | 8.81    | 13.82 | 6.11E-09 | 5.18E-06  | 0.999983        | 4868      |
| TEAD2       | 2.47        | 1.304106 | 9.81    | 7.93  | 3.19E-06 | 0.000258  | 0.992605        | 13232     |
| TMEM45A     | 2.46        | 1.301321 | 10.38   | 9.39  | 5.15E-07 | 9.35E-05  | 0.998788        | 13570     |
| FND3A       | 2.46        | 1.298182 | 9.23    | 11.81 | 3.84E-08 | 1.83E-05  | 0.999903        | 4766      |
| IGFBP7      | 2.45        | 1.290799 | 8.89    | 6.36  | 3.00E-05 | 0.001116  | 0.933044        | 6243      |
| VGF         | 2.42        | 1.277906 | 8.81    | 6.71  | 1.78E-05 | 0.000799  | 0.959557        | 14401     |
| SP140       | 2.42        | 1.277282 | 8.34    | 4.23  | 0.001075 | 0.011504  | 0.27046         | 12656     |
| SMPDL3A     | 2.41        | 1.269333 | 8.82    | 9.86  | 2.99E-07 | 6.85E-05  | 0.999289        | 12477     |
| RAF1        | 2.41        | 1.268832 | 9.44    | 14.61 | 3.19E-09 | 3.24E-06  | 0.99999         | 10980     |
| RTKN        | 2.41        | 1.267058 | 11.53   | 9.28  | 5.82E-07 | 0.000101  | 0.998634        | 11639     |
| C4orf18     | 2.39        | 1.254274 | 9.22    | 9.55  | 4.27E-07 | 8.56E-05  | 0.998993        | 1906      |
| FST         | 2.38        | 1.252832 | 12.02   | 9.08  | 7.39E-07 | 0.000109  | 0.998268        | 4819      |
| CDKN2B      | 2.38        | 1.248617 | 8.95    | 5.34  | 0.000154 | 0.003157  | 0.725691        | 2559      |
| WIP1        | 2.34        | 1.228062 | 9.48    | 12.06 | 3.00E-08 | 1.64E-05  | 0.999923        | 14583     |
| SMARCD1     | 2.31        | 1.209529 | 11.53   | 9.89  | 2.89E-07 | 6.85E-05  | 0.999312        | 12450     |
| FBXO21      | 2.30        | 1.204621 | 10.89   | 11.40 | 5.75E-08 | 2.14E-05  | 0.999857        | 4521      |
| C17orf63    | 2.30        | 1.201372 | 9.87    | 8.26  | 2.07E-06 | 0.000213  | 0.995175        | 1589      |
| CCNG1       | 2.30        | 1.200704 | 12.22   | 5.62  | 9.65E-05 | 0.002364  | 0.810044        | 2380      |
| EGFR        | 2.30        | 1.199502 | 9.00    | 7.87  | 3.47E-06 | 0.000274  | 0.991952        | 3971      |
| CHURC1      | 2.29        | 1.195124 | 9.45    | 11.36 | 5.99E-08 | 2.17E-05  | 0.999851        | 2745      |
| ARG2        | 2.29        | 1.194953 | 9.52    | 4.07  | 0.001426 | 0.013985  | 0.218087        | 698       |
| MTP         | 2.29        | 1.193966 | 9.77    | 6.53  | 2.33E-05 | 0.000968  | 0.947433        | 8803      |
| CHN2        | 2.29        | 1.193893 | 10.00   | 8.44  | 1.63E-06 | 0.000182  | 0.996194        | 2722      |
| B3GALT6     | 2.29        | 1.192545 | 9.03    | 11.50 | 5.19E-08 | 2.01E-05  | 0.99987         | 1055      |
| FND3A       | 2.29        | 1.192382 | 9.20    | 8.01  | 2.85E-06 | 0.000243  | 0.993381        | 4767      |
| C5orf32     | 2.28        | 1.191391 | 10.61   | 9.89  | 2.87E-07 | 6.85E-05  | 0.999319        | 1932      |
| CCND2       | 2.28        | 1.189509 | 8.14    | 5.75  | 7.89E-05 | 0.002081  | 0.839564        | 2371      |
| MBNL2       | 2.23        | 1.159058 | 10.73   | 6.32  | 3.18E-05 | 0.001147  | 0.929326        | 8234      |
| BTG3        | 2.23        | 1.158694 | 11.09   | 9.26  | 5.94E-07 | 0.000102  | 0.998604        | 1319      |
| RBPM2       | 2.22        | 1.150951 | 8.75    | 7.60  | 4.98E-06 | 0.000348  | 0.988462        | 11126     |
| SLC25A22    | 2.22        | 1.147557 | 8.83    | 12.63 | 1.76E-08 | 1.10E-05  | 0.999954        | 12222     |
| MLL11       | 2.20        | 1.139098 | 10.11   | 4.90  | 0.000326 | 0.005169  | 0.553044        | 8499      |
| WDR72       | 2.19        | 1.134047 | 10.44   | 9.52  | 4.38E-07 | 8.67E-05  | 0.998968        | 14556     |
| WDR40A      | 2.19        | 1.129071 | 10.38   | 9.68  | 3.65E-07 | 7.73E-05  | 0.999136        | 14526     |
| TAGLN3      | 2.17        | 1.117833 | 8.50    | 3.77  | 0.002503 | 0.020317  | 0.136865        | 13097     |
| TRAK1       | 2.16        | 1.110207 | 9.28    | 9.74  | 3.40E-07 | 7.39E-05  | 0.999194        | 13786     |
| PC          | 2.16        | 1.109586 | 9.65    | 8.00  | 2.89E-06 | 0.000243  | 0.993279        | 9740      |
| ATAD1       | 2.16        | 1.107956 | 10.56   | 11.98 | 3.25E-08 | 1.71E-05  | 0.999917        | 874       |
| DSCR6       | 2.15        | 1.103656 | 8.99    | 6.29  | 3.32E-05 | 0.001187  | 0.926387        | 3794      |
| CREB3L2     | 2.15        | 1.103642 | 10.53   | 5.92  | 5.98E-05 | 0.001707  | 0.873951        | 3072      |
| IGFBP1      | 2.15        | 1.102804 | 14.19   | 6.04  | 4.94E-05 | 0.001534  | 0.89383         | 6239      |
| FST         | 2.15        | 1.102353 | 9.96    | 9.33  | 5.52E-07 | 9.79E-05  | 0.998702        | 4818      |
| IGSF1       | 2.14        | 1.100499 | 9.27    | 4.95  | 0.000297 | 0.004834  | 0.576641        | 6246      |
| CPVL        | 2.14        | 1.097281 | 11.71   | 4.65  | 0.000506 | 0.006987  | 0.442411        | 3058      |
| INPP1       | 2.14        | 1.096726 | 11.38   | 8.67  | 1.23E-06 | 0.000152  | 0.997135        | 6334      |
| SP140       | 2.13        | 1.093065 | 8.19    | 4.49  | 0.000672 | 0.008439  | 0.373433        | 12655     |

|          |      |          |       |       |          |          |          |       |
|----------|------|----------|-------|-------|----------|----------|----------|-------|
| FCGRT    | 2.13 | 1.092933 | 10.56 | 6.40  | 2.83E-05 | 0.001078 | 0.936779 | 4569  |
| MAP1LC3B | 2.13 | 1.090184 | 10.70 | 12.13 | 2.82E-08 | 1.59E-05 | 0.999927 | 8104  |
| DUSP6    | 2.13 | 1.088504 | 11.05 | 5.98  | 5.45E-05 | 0.00163  | 0.883871 | 3849  |
| LGALS8   | 2.13 | 1.087687 | 10.86 | 9.58  | 4.11E-07 | 8.47E-05 | 0.99903  | 6955  |
| UCRC     | 2.12 | 1.084957 | 9.30  | 10.03 | 2.46E-07 | 6.35E-05 | 0.999414 | 14208 |
| TSPAN7   | 2.12 | 1.081955 | 10.49 | 10.75 | 1.12E-07 | 3.56E-05 | 0.999727 | 13938 |
| FMO5     | 2.11 | 1.079389 | 10.75 | 4.15  | 0.001245 | 0.01266  | 0.242249 | 4756  |
| LRP10    | 2.10 | 1.073487 | 10.14 | 8.68  | 1.22E-06 | 0.000152 | 0.997157 | 7915  |
| ERP27    | 2.10 | 1.072857 | 12.23 | 4.24  | 0.00105  | 0.011344 | 0.275109 | 4188  |
| DLK1     | 2.08 | 1.059265 | 10.96 | 4.50  | 0.000662 | 0.008325 | 0.37704  | 3643  |
| SLC35F2  | 2.08 | 1.055686 | 10.04 | 5.08  | 0.000241 | 0.004218 | 0.62776  | 12317 |
| MGC24039 | 2.08 | 1.05354  | 9.21  | 10.04 | 2.43E-07 | 6.35E-05 | 0.99942  | 8400  |
| BTG3     | 2.07 | 1.052957 | 9.78  | 9.02  | 7.97E-07 | 0.000114 | 0.998135 | 1320  |
| TMEM107  | 2.07 | 1.051571 | 8.90  | 5.86  | 6.53E-05 | 0.001804 | 0.86376  | 13455 |
| MBNL1    | 2.07 | 1.051142 | 9.21  | 10.14 | 2.17E-07 | 5.92E-05 | 0.999482 | 8231  |
| ZFP36L1  | 2.07 | 1.047267 | 10.75 | 4.89  | 0.000329 | 0.005176 | 0.550798 | 14807 |
| SERPINE2 | 2.07 | 1.047192 | 13.20 | 6.43  | 2.69E-05 | 0.001044 | 0.9397   | 11963 |
| SLC35B1  | 2.07 | 1.046263 | 11.52 | 8.00  | 2.89E-06 | 0.000243 | 0.993295 | 12305 |
| DUSP6    | 2.06 | 1.044617 | 9.57  | 4.94  | 0.000304 | 0.004919 | 0.57084  | 3850  |
| TMEM45A  | 2.04 | 1.030141 | 9.44  | 6.26  | 3.51E-05 | 0.001228 | 0.922479 | 13569 |
| FBLN1    | 2.04 | 1.028962 | 10.74 | 5.12  | 0.000224 | 0.004015 | 0.644637 | 4496  |
| MXRA7    | 2.03 | 1.021865 | 10.67 | 5.73  | 8.12E-05 | 0.00212  | 0.835601 | 8834  |
| FIGNL2   | 2.03 | 1.01865  | 8.11  | 8.12  | 2.49E-06 | 0.000233 | 0.99422  | 7223  |
| IL8      | 2.02 | 1.015756 | 13.45 | 4.20  | 0.001131 | 0.011933 | 0.260402 | 6299  |
| PON3     | 2.02 | 1.013222 | 9.73  | 6.97  | 1.20E-05 | 0.000636 | 0.972336 | 10338 |
| SET      | 2.01 | 1.010556 | 11.24 | 7.21  | 8.51E-06 | 0.000519 | 0.980354 | 11976 |
| HK1      | 2.01 | 1.010376 | 10.62 | 4.25  | 0.001038 | 0.011253 | 0.277452 | 5564  |
| CPVL     | 2.01 | 1.009397 | 11.02 | 3.86  | 0.002119 | 0.018143 | 0.157748 | 3059  |
| PROS1    | 2.01 | 1.008023 | 11.46 | 5.95  | 5.72E-05 | 0.001654 | 0.87887  | 10586 |
| CDKN2B   | 2.01 | 1.006624 | 8.31  | 5.60  | 0.0001   | 0.002399 | 0.803885 | 2560  |
| CRLF1    | 2.01 | 1.006316 | 8.35  | 9.00  | 8.15E-07 | 0.000115 | 0.998093 | 3093  |
| VCL      | 2.01 | 1.004797 | 12.10 | 5.92  | 5.95E-05 | 0.001706 | 0.874478 | 14388 |
| CD59     | 1.99 | 0.993616 | 8.31  | 6.08  | 4.65E-05 | 0.001481 | 0.899456 | 2451  |
| KLF15    | 1.98 | 0.987232 | 8.35  | 8.19  | 2.27E-06 | 0.000228 | 0.994731 | 6762  |
| IL8      | 1.98 | 0.987159 | 12.41 | 4.42  | 0.000759 | 0.009153 | 0.344969 | 6300  |
| DNM1L    | 1.98 | 0.986144 | 9.76  | 6.11  | 4.44E-05 | 0.001421 | 0.903538 | 3719  |
| CCNY     | 1.98 | 0.984997 | 9.45  | 9.16  | 6.71E-07 | 0.000105 | 0.998427 | 2395  |
| KDELR3   | 1.98 | 0.982307 | 10.54 | 7.65  | 4.63E-06 | 0.000328 | 0.98928  | 6556  |
| CIDEB    | 1.97 | 0.978575 | 11.19 | 9.46  | 4.73E-07 | 9.12E-05 | 0.998887 | 2753  |
| ZNF189   | 1.97 | 0.977732 | 10.04 | 6.26  | 3.48E-05 | 0.001226 | 0.923031 | 14901 |
| PIK3R2   | 1.97 | 0.977698 | 12.22 | 8.74  | 1.12E-06 | 0.000144 | 0.997386 | 10083 |
| C8A      | 1.97 | 0.976066 | 10.09 | 4.58  | 0.000576 | 0.007655 | 0.410591 | 2020  |
| RAB3GAP1 | 1.96 | 0.970287 | 11.09 | 9.62  | 3.91E-07 | 8.16E-05 | 0.999077 | 10905 |
| RNASEH1  | 1.96 | 0.970107 | 10.10 | 7.01  | 1.14E-05 | 0.000615 | 0.97386  | 11319 |
| GAMT     | 1.96 | 0.968868 | 10.68 | 4.57  | 0.000582 | 0.007697 | 0.407969 | 4939  |
| NMD3     | 1.96 | 0.967562 | 10.65 | 7.32  | 7.29E-06 | 0.000467 | 0.98315  | 9196  |
| TOMM34   | 1.95 | 0.963402 | 11.80 | 5.26  | 0.000177 | 0.003449 | 0.696918 | 13695 |
| VPS24    | 1.95 | 0.961504 | 9.60  | 9.11  | 7.18E-07 | 0.000108 | 0.998316 | 14423 |
| APOM     | 1.95 | 0.961419 | 11.89 | 5.43  | 0.000132 | 0.002835 | 0.756272 | 652   |
| SYF2     | 1.94 | 0.959585 | 9.94  | 10.17 | 2.11E-07 | 5.92E-05 | 0.999494 | 13026 |
| RECK     | 1.94 | 0.957812 | 8.24  | 11.64 | 4.55E-08 | 1.95E-05 | 0.999885 | 11160 |
| HPRT1    | 1.94 | 0.955254 | 11.91 | 8.13  | 2.44E-06 | 0.000233 | 0.994324 | 5686  |

|           |      |          |       |      |          |          |          |       |
|-----------|------|----------|-------|------|----------|----------|----------|-------|
| FOXN3     | 1.93 | 0.95232  | 10.56 | 5.16 | 0.000207 | 0.003833 | 0.662191 | 2696  |
| SLC26A3   | 1.93 | 0.948119 | 8.38  | 5.95 | 5.71E-05 | 0.001654 | 0.879045 | 12255 |
| LGALS8    | 1.92 | 0.944602 | 10.74 | 6.91 | 1.31E-05 | 0.00066  | 0.969927 | 6954  |
| TSPAN7    | 1.92 | 0.942506 | 9.65  | 8.04 | 2.75E-06 | 0.000243 | 0.993619 | 13939 |
| IL27RA    | 1.91 | 0.936253 | 8.91  | 8.79 | 1.05E-06 | 0.000138 | 0.997543 | 6288  |
| MAPK6     | 1.91 | 0.932498 | 12.29 | 4.50 | 0.000655 | 0.008291 | 0.37938  | 8155  |
| SLC2A10   | 1.91 | 0.932432 | 10.00 | 4.85 | 0.000353 | 0.005403 | 0.533264 | 12272 |
| PLCH2     | 1.89 | 0.91951  | 10.32 | 4.11 | 0.001324 | 0.01327  | 0.23104  | 10165 |
| DHRS3     | 1.89 | 0.916122 | 10.55 | 8.63 | 1.29E-06 | 0.000158 | 0.996983 | 3551  |
| SLC7A9    | 1.89 | 0.915276 | 9.53  | 5.67 | 8.88E-05 | 0.002246 | 0.822714 | 12403 |
| GPT2      | 1.88 | 0.913513 | 12.94 | 4.83 | 0.00037  | 0.005575 | 0.521599 | 5251  |
| ANKRD13A  | 1.88 | 0.911597 | 11.06 | 7.27 | 7.85E-06 | 0.00049  | 0.981881 | 516   |
| DNM1L     | 1.88 | 0.910005 | 9.40  | 5.75 | 7.79E-05 | 0.002063 | 0.841255 | 3721  |
| MDK       | 1.88 | 0.909397 | 8.28  | 9.23 | 6.20E-07 | 0.000102 | 0.998545 | 8285  |
| USP16     | 1.88 | 0.908079 | 10.01 | 9.19 | 6.49E-07 | 0.000103 | 0.998477 | 14311 |
| TOB1      | 1.88 | 0.907073 | 10.74 | 5.62 | 9.71E-05 | 0.002364 | 0.809026 | 13684 |
| UCRC      | 1.87 | 0.906781 | 9.34  | 6.92 | 1.31E-05 | 0.00066  | 0.969977 | 14209 |
| CCDC92    | 1.87 | 0.906333 | 10.46 | 6.26 | 3.51E-05 | 0.001228 | 0.922567 | 2347  |
| USP16     | 1.87 | 0.90304  | 10.41 | 8.91 | 9.07E-07 | 0.000125 | 0.997878 | 14312 |
| LARP6     | 1.87 | 0.900722 | 8.33  | 3.79 | 0.002418 | 0.019804 | 0.141007 | 6895  |
| RBBP9     | 1.87 | 0.899999 | 10.41 | 5.03 | 0.000262 | 0.004428 | 0.606923 | 11064 |
| EVII      | 1.87 | 0.899509 | 8.35  | 2.83 | 0.014745 | 0.067458 | 0.026751 | 4226  |
| NDRG4     | 1.86 | 0.897448 | 11.89 | 7.83 | 3.65E-06 | 0.000281 | 0.991527 | 9017  |
| ANTXR1    | 1.86 | 0.895584 | 9.25  | 4.24 | 0.001058 | 0.011386 | 0.273654 | 561   |
| NAT8B     | 1.86 | 0.894198 | 9.35  | 4.32 | 0.000906 | 0.010241 | 0.305739 | 8948  |
| BDH1      | 1.85 | 0.889959 | 9.29  | 5.09 | 0.000235 | 0.004138 | 0.632839 | 1178  |
| COBLL1    | 1.85 | 0.889068 | 11.47 | 5.39 | 0.000142 | 0.00297  | 0.741786 | 2912  |
| CYGB      | 1.85 | 0.886191 | 10.61 | 3.09 | 0.00903  | 0.048858 | 0.042489 | 3305  |
| SGSH      | 1.85 | 0.885551 | 10.07 | 5.28 | 0.000169 | 0.003353 | 0.70665  | 12056 |
| NOPE      | 1.85 | 0.884486 | 8.54  | 8.75 | 1.11E-06 | 0.000144 | 0.997408 | 9263  |
| HMGCL     | 1.84 | 0.883217 | 9.37  | 9.97 | 2.63E-07 | 6.68E-05 | 0.999374 | 5602  |
| IL17D     | 1.84 | 0.877443 | 9.20  | 7.07 | 1.04E-05 | 0.00059  | 0.975952 | 6272  |
| PTPRK     | 1.84 | 0.877001 | 10.73 | 3.37 | 0.005242 | 0.033528 | 0.070537 | 10791 |
| ACAD11    | 1.84 | 0.8761   | 10.51 | 5.98 | 5.46E-05 | 0.00163  | 0.883727 | 105   |
| LRRC8B    | 1.83 | 0.875102 | 10.34 | 5.83 | 6.92E-05 | 0.001878 | 0.856637 | 5911  |
| ASF1A     | 1.83 | 0.87106  | 10.62 | 7.55 | 5.34E-06 | 0.000369 | 0.987634 | 843   |
| PPARG     | 1.83 | 0.869998 | 11.23 | 8.45 | 1.63E-06 | 0.000182 | 0.996212 | 10363 |
| NPAS1     | 1.82 | 0.865014 | 8.50  | 6.84 | 1.47E-05 | 0.000709 | 0.966404 | 9275  |
| METTL7B   | 1.82 | 0.863096 | 9.60  | 8.82 | 1.02E-06 | 0.000136 | 0.99762  | 8361  |
| KIAA1199  | 1.82 | 0.862916 | 11.96 | 3.46 | 0.004505 | 0.030416 | 0.08107  | 6653  |
| INHBE     | 1.82 | 0.861168 | 8.58  | 4.50 | 0.000656 | 0.008292 | 0.379165 | 6332  |
| RHOBTB3   | 1.81 | 0.858253 | 11.02 | 5.83 | 6.94E-05 | 0.00188  | 0.856324 | 11267 |
| CMBL      | 1.81 | 0.852027 | 12.27 | 8.59 | 1.36E-06 | 0.000162 | 0.996826 | 2854  |
| ANAPC1    | 1.80 | 0.850903 | 10.27 | 8.13 | 2.46E-06 | 0.000233 | 0.994287 | 484   |
| IGFBP4    | 1.80 | 0.849436 | 8.99  | 4.40 | 0.000785 | 0.009349 | 0.337482 | 6241  |
| GDE1      | 1.80 | 0.846691 | 9.67  | 9.23 | 6.19E-07 | 0.000102 | 0.998547 | 5006  |
| RPS6KB1   | 1.79 | 0.84103  | 9.93  | 6.13 | 4.28E-05 | 0.00138  | 0.906858 | 11582 |
| C8orf4    | 1.79 | 0.836041 | 10.63 | 4.67 | 0.000487 | 0.006804 | 0.452157 | 2028  |
| LOC644310 | 1.78 | 0.835505 | 9.32  | 5.95 | 5.67E-05 | 0.001654 | 0.879699 | 7413  |
| ITGA10    | 1.78 | 0.835441 | 8.13  | 7.00 | 1.17E-05 | 0.000626 | 0.973207 | 6419  |
| CHN2      | 1.78 | 0.835215 | 9.09  | 5.42 | 0.000135 | 0.002872 | 0.75252  | 2721  |
| PLOD2     | 1.78 | 0.834936 | 9.33  | 5.30 | 0.000164 | 0.003294 | 0.71373  | 10209 |

|           |      |          |       |       |          |          |          |       |
|-----------|------|----------|-------|-------|----------|----------|----------|-------|
| KLHDC5    | 1.78 | 0.834549 | 8.97  | 9.41  | 5.02E-07 | 9.33E-05 | 0.998819 | 6772  |
| SLC2A2    | 1.78 | 0.833448 | 11.07 | 4.59  | 0.000559 | 0.00752  | 0.417883 | 12276 |
| ROD1      | 1.78 | 0.832814 | 11.62 | 6.44  | 2.67E-05 | 0.00104  | 0.940064 | 11411 |
| FOXA3     | 1.78 | 0.83142  | 10.81 | 7.86  | 3.49E-06 | 0.000274 | 0.991898 | 4778  |
| DAP       | 1.78 | 0.830985 | 10.69 | 4.53  | 0.000628 | 0.008038 | 0.389616 | 3345  |
| NPLOC4    | 1.78 | 0.830946 | 9.01  | 11.60 | 4.70E-08 | 1.95E-05 | 0.999882 | 9291  |
| LOC285733 | 1.78 | 0.829501 | 10.36 | 5.87  | 6.42E-05 | 0.001781 | 0.865773 | 7120  |
| SLAIN1    | 1.78 | 0.828612 | 8.61  | 5.43  | 0.000133 | 0.002847 | 0.754664 | 12155 |
| BOLA2     | 1.77 | 0.823455 | 12.84 | 7.11  | 9.92E-06 | 0.000571 | 0.977158 | 1239  |
| GOLIM4    | 1.77 | 0.820885 | 9.62  | 5.16  | 0.000209 | 0.003842 | 0.660157 | 5170  |
| CYP4F3    | 1.77 | 0.820532 | 9.04  | 3.37  | 0.005335 | 0.033946 | 0.06941  | 3328  |
| HPRT1     | 1.76 | 0.81917  | 10.53 | 5.49  | 0.00012  | 0.002706 | 0.774265 | 5687  |
| DNAJC12   | 1.76 | 0.818337 | 11.22 | 6.49  | 2.47E-05 | 0.000992 | 0.944333 | 3692  |
| ETFB      | 1.76 | 0.814997 | 11.85 | 4.90  | 0.000325 | 0.005169 | 0.553896 | 4209  |
| LOC401152 | 1.76 | 0.814766 | 9.60  | 6.94  | 1.27E-05 | 0.000651 | 0.97091  | 7215  |
| AGPAT5    | 1.75 | 0.809901 | 9.16  | 4.96  | 0.000296 | 0.004821 | 0.577868 | 310   |
| LRIG1     | 1.75 | 0.806661 | 9.50  | 4.48  | 0.000677 | 0.008483 | 0.371621 | 7912  |
| CCDC115   | 1.75 | 0.806623 | 9.76  | 6.94  | 1.26E-05 | 0.00065  | 0.971106 | 2271  |
| VPS24     | 1.75 | 0.805693 | 10.55 | 7.44  | 6.19E-06 | 0.000411 | 0.985676 | 14422 |
| UBE2E3    | 1.75 | 0.804915 | 11.32 | 4.22  | 0.0011   | 0.011705 | 0.265936 | 14127 |
| BTF3L4    | 1.75 | 0.804728 | 10.54 | 6.36  | 3.00E-05 | 0.001116 | 0.933088 | 1316  |
| PIK3AP1   | 1.74 | 0.80283  | 8.87  | 7.15  | 9.38E-06 | 0.00055  | 0.978387 | 10073 |
| C12orf57  | 1.74 | 0.800273 | 10.82 | 4.93  | 0.000307 | 0.004939 | 0.56842  | 1445  |
| KDELR3    | 1.74 | 0.799901 | 10.66 | 6.19  | 3.92E-05 | 0.001307 | 0.914185 | 6555  |
| ITM2C     | 1.74 | 0.7997   | 10.29 | 7.31  | 7.42E-06 | 0.000471 | 0.982864 | 6445  |
| SLC4A7    | 1.74 | 0.79905  | 9.84  | 5.60  | 0.000101 | 0.002399 | 0.803489 | 12380 |
| ZNF271    | 1.74 | 0.79761  | 9.29  | 6.36  | 3.01E-05 | 0.001116 | 0.932981 | 14951 |
| C4orf16   | 1.74 | 0.796556 | 9.13  | 5.84  | 6.82E-05 | 0.001868 | 0.858434 | 1905  |
| CNIH      | 1.74 | 0.795819 | 10.92 | 5.94  | 5.79E-05 | 0.001669 | 0.877523 | 5801  |
| TNFRSF14  | 1.73 | 0.794908 | 10.73 | 4.74  | 0.000431 | 0.006213 | 0.482806 | 13649 |
| TMEM30A   | 1.73 | 0.793283 | 8.75  | 5.84  | 6.77E-05 | 0.001858 | 0.859323 | 13554 |
| LY96      | 1.73 | 0.789443 | 8.95  | 6.51  | 2.40E-05 | 0.000973 | 0.945996 | 7997  |
| CRIM1     | 1.73 | 0.788608 | 9.05  | 5.53  | 0.000112 | 0.002579 | 0.785552 | 3083  |
| GAMT      | 1.73 | 0.788462 | 11.21 | 3.99  | 0.001677 | 0.015604 | 0.191562 | 4938  |
| MFGE8     | 1.73 | 0.787104 | 8.99  | 10.78 | 1.09E-07 | 3.55E-05 | 0.999734 | 8372  |
| KIAA0256  | 1.73 | 0.787097 | 8.76  | 9.15  | 6.81E-07 | 0.000106 | 0.998403 | 6589  |
| C14orf149 | 1.72 | 0.785308 | 9.56  | 3.78  | 0.002462 | 0.020078 | 0.138808 | 1492  |
| FAM152B   | 1.72 | 0.784127 | 10.22 | 6.79  | 1.58E-05 | 0.000741 | 0.963826 | 4372  |
| DNAJC12   | 1.72 | 0.783433 | 10.80 | 4.84  | 0.00036  | 0.005476 | 0.528153 | 3693  |
| CMIP      | 1.72 | 0.783321 | 11.49 | 4.20  | 0.001136 | 0.01197  | 0.259677 | 2855  |
| LAMP2     | 1.72 | 0.781524 | 11.63 | 5.64  | 9.32E-05 | 0.002327 | 0.815401 | 6872  |
| HMGCS2    | 1.72 | 0.780706 | 8.47  | 4.56  | 0.000595 | 0.007805 | 0.402636 | 5605  |
| SEC24D    | 1.71 | 0.777727 | 9.54  | 4.74  | 0.000431 | 0.006213 | 0.483001 | 11862 |
| SELT      | 1.71 | 0.777585 | 9.88  | 6.45  | 2.60E-05 | 0.00102  | 0.941608 | 11887 |
| ETFDH     | 1.71 | 0.777344 | 9.88  | 6.14  | 4.21E-05 | 0.001363 | 0.908302 | 4211  |
| ITM2C     | 1.71 | 0.775813 | 10.70 | 8.14  | 2.41E-06 | 0.000233 | 0.994398 | 6446  |
| DIABLO    | 1.71 | 0.773932 | 12.39 | 8.67  | 1.23E-06 | 0.000152 | 0.997123 | 3584  |
| MFAP3     | 1.71 | 0.772812 | 8.84  | 6.94  | 1.26E-05 | 0.00065  | 0.97108  | 8370  |
| ST6GAL1   | 1.71 | 0.772506 | 12.22 | 3.71  | 0.002799 | 0.022136 | 0.124148 | 12837 |
| SOAT2     | 1.71 | 0.771975 | 8.47  | 6.20  | 3.86E-05 | 0.001295 | 0.915231 | 12604 |
| CCL16     | 1.71 | 0.77012  | 10.70 | 2.91  | 0.01271  | 0.061257 | 0.030782 | 2353  |
| C3orf21   | 1.71 | 0.769931 | 10.35 | 4.93  | 0.000307 | 0.004939 | 0.568552 | 1870  |

|           |      |          |       |       |          |          |          |       |
|-----------|------|----------|-------|-------|----------|----------|----------|-------|
| C10orf32  | 1.70 | 0.768321 | 10.68 | 5.37  | 0.000146 | 0.003024 | 0.73725  | 1359  |
| KIAA0430  | 1.70 | 0.76756  | 11.25 | 3.45  | 0.004548 | 0.030613 | 0.080364 | 6607  |
| C4orf32   | 1.70 | 0.765905 | 9.08  | 6.42  | 2.76E-05 | 0.00106  | 0.938272 | 1914  |
| CCBL2     | 1.70 | 0.763791 | 9.88  | 4.04  | 0.001514 | 0.01459  | 0.207937 | 2254  |
| C1orf115  | 1.70 | 0.761747 | 11.02 | 5.76  | 7.68E-05 | 0.002041 | 0.843133 | 1676  |
| TMC6      | 1.69 | 0.759419 | 9.24  | 5.72  | 8.23E-05 | 0.002136 | 0.8336   | 13427 |
| UCP2      | 1.69 | 0.759032 | 9.36  | 3.63  | 0.003241 | 0.0245   | 0.109083 | 14205 |
| TSPAN9    | 1.69 | 0.758487 | 11.59 | 5.43  | 0.000132 | 0.00284  | 0.755688 | 13941 |
| ABCC5     | 1.69 | 0.756918 | 8.57  | 5.53  | 0.000112 | 0.002579 | 0.785542 | 51    |
| SERPIND1  | 1.69 | 0.756744 | 10.75 | 4.33  | 0.000894 | 0.010173 | 0.308571 | 11961 |
| TRIM2     | 1.69 | 0.756312 | 8.62  | 6.01  | 5.19E-05 | 0.001581 | 0.888855 | 13815 |
| GDAP2     | 1.69 | 0.754578 | 8.42  | 6.52  | 2.34E-05 | 0.000968 | 0.947166 | 5005  |
| IKBKG     | 1.69 | 0.754497 | 11.04 | 8.26  | 2.06E-06 | 0.000213 | 0.995203 | 6258  |
| SH3BGRL2  | 1.69 | 0.753191 | 10.95 | 6.61  | 2.07E-05 | 0.000901 | 0.953079 | 12068 |
| EMP3      | 1.68 | 0.751503 | 10.31 | 2.73  | 0.017761 | 0.076518 | 0.022438 | 4090  |
| LAMP2     | 1.68 | 0.75069  | 10.69 | 4.47  | 0.000694 | 0.008626 | 0.365667 | 6874  |
| MAGED1    | 1.68 | 0.749806 | 11.43 | 2.66  | 0.020314 | 0.084071 | 0.019767 | 8059  |
| LOC145842 | 1.68 | 0.749799 | 8.09  | 7.85  | 3.52E-06 | 0.000276 | 0.991826 | 5899  |
| CFB       | 1.68 | 0.748821 | 10.49 | 4.15  | 0.001246 | 0.012665 | 0.242055 | 2652  |
| C2CD2     | 1.68 | 0.748608 | 9.89  | 7.11  | 9.88E-06 | 0.000571 | 0.977241 | 1836  |
| C10orf32  | 1.68 | 0.745643 | 10.82 | 6.18  | 3.96E-05 | 0.001313 | 0.913296 | 1360  |
| LGALS1    | 1.68 | 0.744664 | 13.03 | 3.21  | 0.007167 | 0.041567 | 0.052763 | 6949  |
| ARMCX6    | 1.67 | 0.742518 | 9.27  | 5.18  | 0.000202 | 0.00378  | 0.668138 | 783   |
| PCOLCE2   | 1.67 | 0.741888 | 11.32 | 6.37  | 2.97E-05 | 0.001112 | 0.933696 | 9789  |
| LMBRD2    | 1.67 | 0.740995 | 9.13  | 4.53  | 0.000625 | 0.008022 | 0.390432 | 5800  |
| EIF4EBP2  | 1.67 | 0.739587 | 9.94  | 6.20  | 3.84E-05 | 0.001292 | 0.91575  | 4035  |
| CSF3R     | 1.67 | 0.738819 | 8.28  | 3.59  | 0.003495 | 0.025706 | 0.101982 | 3137  |
| C1RL      | 1.67 | 0.738609 | 8.85  | 6.22  | 3.70E-05 | 0.001277 | 0.918591 | 1746  |
| PC        | 1.67 | 0.738545 | 8.67  | 6.13  | 4.32E-05 | 0.00139  | 0.906028 | 9739  |
| SFXN1     | 1.67 | 0.738448 | 9.86  | 3.86  | 0.002117 | 0.018143 | 0.157884 | 12036 |
| LSM1      | 1.67 | 0.738119 | 12.61 | 7.25  | 8.12E-06 | 0.000501 | 0.981265 | 7966  |
| C22orf16  | 1.67 | 0.737964 | 11.31 | 4.40  | 0.000794 | 0.009412 | 0.334911 | 1826  |
| IGFBP2    | 1.67 | 0.737108 | 10.82 | 2.93  | 0.012048 | 0.058992 | 0.032377 | 6240  |
| HEBP1     | 1.67 | 0.73696  | 10.85 | 6.15  | 4.18E-05 | 0.00136  | 0.908815 | 5464  |
| C6orf192  | 1.67 | 0.736735 | 10.01 | 5.66  | 9.09E-05 | 0.002286 | 0.819211 | 1969  |
| BNIP3L    | 1.67 | 0.736703 | 8.43  | 5.18  | 0.000203 | 0.00378  | 0.66763  | 1234  |
| NMD3      | 1.67 | 0.735724 | 9.85  | 5.63  | 9.53E-05 | 0.002352 | 0.811996 | 9197  |
| RPAIN     | 1.66 | 0.734771 | 11.30 | 8.04  | 2.76E-06 | 0.000243 | 0.993598 | 11423 |
| CIDEC     | 1.66 | 0.734009 | 11.63 | 6.40  | 2.84E-05 | 0.001079 | 0.936592 | 2754  |
| LRBA      | 1.66 | 0.73322  | 9.54  | 4.52  | 0.00063  | 0.008066 | 0.388558 | 7902  |
| SH3PXD2A  | 1.66 | 0.732733 | 11.08 | 4.87  | 0.000341 | 0.005293 | 0.541797 | 12079 |
| PPARG     | 1.66 | 0.732193 | 9.22  | 7.04  | 1.09E-05 | 0.000603 | 0.97501  | 10364 |
| KCTD14    | 1.66 | 0.729765 | 10.03 | 6.41  | 2.76E-05 | 0.00106  | 0.938142 | 6537  |
| ACTA2     | 1.66 | 0.729678 | 14.05 | 9.04  | 7.83E-07 | 0.000113 | 0.998167 | 180   |
| RRAGA     | 1.66 | 0.729442 | 12.57 | 10.13 | 2.21E-07 | 5.92E-05 | 0.999471 | 11601 |
| HBP1      | 1.66 | 0.727535 | 9.25  | 8.79  | 1.06E-06 | 0.000138 | 0.997527 | 5426  |
| ROD1      | 1.65 | 0.725305 | 11.77 | 6.09  | 4.60E-05 | 0.001467 | 0.900535 | 11410 |
| SEPHS1    | 1.65 | 0.725135 | 11.27 | 6.29  | 3.33E-05 | 0.001187 | 0.926232 | 11908 |
| ART4      | 1.65 | 0.724718 | 9.30  | 5.34  | 0.000155 | 0.003158 | 0.72535  | 816   |
| RNMT      | 1.65 | 0.722426 | 10.23 | 7.19  | 8.79E-06 | 0.00053  | 0.979729 | 11395 |
| RAN       | 1.65 | 0.720277 | 10.55 | 5.48  | 0.000122 | 0.002736 | 0.770704 | 10998 |
| TUBB2B    | 1.65 | 0.720169 | 11.42 | 4.16  | 0.001219 | 0.012485 | 0.246119 | 14013 |

|             |      |          |       |      |          |          |          |       |
|-------------|------|----------|-------|------|----------|----------|----------|-------|
| LYVE1       | 1.65 | 0.718801 | 8.07  | 5.83 | 6.87E-05 | 0.001876 | 0.85748  | 14622 |
| CMTM8       | 1.64 | 0.717155 | 10.74 | 5.98 | 5.43E-05 | 0.001629 | 0.884227 | 2866  |
| ST7         | 1.64 | 0.716147 | 8.79  | 6.90 | 1.34E-05 | 0.000666 | 0.969378 | 12841 |
| VCAN        | 1.64 | 0.716125 | 9.92  | 2.52 | 0.026211 | 0.099834 | 0.015551 | 14387 |
| HSPB1       | 1.64 | 0.715897 | 12.57 | 4.60 | 0.000555 | 0.007482 | 0.419487 | 6122  |
| GRTP1       | 1.64 | 0.714815 | 9.94  | 4.02 | 0.001573 | 0.014989 | 0.201664 | 5290  |
| C9orf103    | 1.64 | 0.711184 | 8.89  | 3.61 | 0.003359 | 0.025028 | 0.105667 | 2044  |
| PIGH        | 1.64 | 0.710944 | 9.96  | 7.72 | 4.23E-06 | 0.000315 | 0.990187 | 10051 |
| SLC2A1      | 1.64 | 0.709635 | 10.78 | 4.90 | 0.000326 | 0.005169 | 0.553106 | 12270 |
| PRRG1       | 1.64 | 0.709562 | 9.74  | 5.11 | 0.000227 | 0.004046 | 0.641658 | 10625 |
| PTMS        | 1.64 | 0.709559 | 9.05  | 5.87 | 6.45E-05 | 0.001786 | 0.86516  | 10751 |
| LRRC8A      | 1.64 | 0.709474 | 9.97  | 6.92 | 1.30E-05 | 0.00066  | 0.97008  | 7951  |
| SUPT4H1     | 1.63 | 0.708817 | 10.55 | 8.27 | 2.04E-06 | 0.000213 | 0.995249 | 13004 |
| UCKL1       | 1.63 | 0.708439 | 10.99 | 8.08 | 2.60E-06 | 0.000238 | 0.993951 | 14202 |
| HIBADH      | 1.63 | 0.708328 | 11.30 | 4.86 | 0.000352 | 0.005396 | 0.534347 | 5511  |
| PANK1       | 1.63 | 0.708021 | 10.74 | 3.88 | 0.002019 | 0.017631 | 0.164297 | 9668  |
| ARRB1       | 1.63 | 0.707152 | 8.28  | 6.25 | 3.54E-05 | 0.001234 | 0.921879 | 798   |
| LOC203547   | 1.63 | 0.704414 | 11.53 | 5.20 | 0.000196 | 0.003701 | 0.675184 | 7084  |
| CASP4       | 1.63 | 0.70372  | 11.44 | 5.46 | 0.000127 | 0.00277  | 0.763722 | 2201  |
| MBNL1       | 1.63 | 0.70336  | 8.96  | 7.02 | 1.13E-05 | 0.000612 | 0.974123 | 8230  |
| PLSCR3      | 1.63 | 0.701741 | 11.25 | 4.12 | 0.001312 | 0.013181 | 0.232717 | 10221 |
| TRIM41      | 1.63 | 0.700449 | 8.79  | 9.14 | 6.93E-07 | 0.000106 | 0.998374 | 13843 |
| EID2        | 1.62 | 0.700354 | 9.61  | 5.62 | 9.66E-05 | 0.002364 | 0.809908 | 3986  |
| KLHDC2      | 1.62 | 0.699318 | 11.45 | 3.62 | 0.003319 | 0.024804 | 0.106809 | 6769  |
| MBD6        | 1.62 | 0.695483 | 9.87  | 4.47 | 0.000697 | 0.008635 | 0.364747 | 8226  |
| TNRC6B      | 1.62 | 0.694777 | 9.36  | 8.10 | 2.56E-06 | 0.000237 | 0.994051 | 13680 |
| MOV10       | 1.62 | 0.693451 | 8.23  | 8.41 | 1.70E-06 | 0.000185 | 0.996039 | 8552  |
| CNTNAP1     | 1.62 | 0.693428 | 8.77  | 6.57 | 2.19E-05 | 0.00093  | 0.950394 | 2908  |
| KIAA1370    | 1.62 | 0.692553 | 9.09  | 5.49 | 0.00012  | 0.002709 | 0.773154 | 6668  |
| PLLP        | 1.62 | 0.691873 | 12.12 | 4.93 | 0.000311 | 0.004998 | 0.564943 | 10206 |
| C4orf16     | 1.61 | 0.690418 | 8.65  | 6.45 | 2.62E-05 | 0.001024 | 0.941237 | 1904  |
| BAZ2B       | 1.61 | 0.68988  | 8.75  | 6.19 | 3.89E-05 | 0.0013   | 0.914768 | 1111  |
| GLT8D1      | 1.61 | 0.689396 | 9.68  | 5.62 | 9.70E-05 | 0.002364 | 0.809125 | 5091  |
| IVNS1ABP    | 1.61 | 0.688704 | 8.96  | 5.03 | 0.000261 | 0.004413 | 0.608013 | 6460  |
| AXUD1       | 1.61 | 0.687945 | 10.05 | 3.57 | 0.003646 | 0.026429 | 0.098203 | 1044  |
| C11orf75    | 1.61 | 0.687136 | 10.39 | 5.47 | 0.000125 | 0.002763 | 0.766266 | 1414  |
| MRPL42      | 1.61 | 0.683426 | 9.88  | 8.17 | 2.32E-06 | 0.000232 | 0.994596 | 8646  |
| TMEM32      | 1.61 | 0.683151 | 10.89 | 5.40 | 0.000139 | 0.002924 | 0.746443 | 13555 |
| ATAD1       | 1.61 | 0.682614 | 9.17  | 7.67 | 4.53E-06 | 0.000325 | 0.989492 | 875   |
| GALK1       | 1.60 | 0.682486 | 11.92 | 3.65 | 0.003133 | 0.023945 | 0.112415 | 4921  |
| VASN        | 1.60 | 0.682476 | 10.78 | 3.84 | 0.002176 | 0.018455 | 0.154273 | 14378 |
| BOLA2       | 1.60 | 0.681793 | 11.40 | 3.23 | 0.006858 | 0.040453 | 0.054982 | 1241  |
| KRCC1       | 1.60 | 0.681238 | 8.92  | 6.21 | 3.78E-05 | 0.00128  | 0.916941 | 6813  |
| GPER        | 1.60 | 0.681124 | 10.88 | 6.88 | 1.38E-05 | 0.000676 | 0.968431 | 5204  |
| FAM104A     | 1.60 | 0.680672 | 11.10 | 6.28 | 3.42E-05 | 0.001215 | 0.924378 | 4314  |
| RP1-21O18.1 | 1.60 | 0.680188 | 9.27  | 9.22 | 6.28E-07 | 0.000102 | 0.998526 | 6641  |
| AP2M1       | 1.60 | 0.679519 | 10.16 | 5.81 | 7.13E-05 | 0.001914 | 0.852921 | 599   |
| GRAMD3      | 1.60 | 0.678357 | 9.34  | 5.10 | 0.000231 | 0.004096 | 0.636941 | 5259  |
| RAC1        | 1.60 | 0.67799  | 8.05  | 5.92 | 6.00E-05 | 0.001707 | 0.873628 | 10952 |
| TUG1        | 1.59 | 0.672749 | 11.92 | 4.89 | 0.00033  | 0.005176 | 0.550692 | 14033 |
| C4BPA       | 1.59 | 0.670908 | 11.31 | 2.74 | 0.017237 | 0.074734 | 0.023082 | 1900  |
| BCL2L13     | 1.59 | 0.668608 | 10.57 | 4.29 | 0.000969 | 0.010727 | 0.291554 | 1158  |

|          |      |          |       |      |          |          |          |       |
|----------|------|----------|-------|------|----------|----------|----------|-------|
| SLC37A3  | 1.59 | 0.66732  | 9.42  | 6.74 | 1.70E-05 | 0.000776 | 0.961145 | 12322 |
| FJX1     | 1.59 | 0.667237 | 8.64  | 2.67 | 0.019766 | 0.082377 | 0.020284 | 4637  |
| ZNF615   | 1.59 | 0.667008 | 8.45  | 6.79 | 1.56E-05 | 0.000736 | 0.964275 | 15109 |
| EXOC7    | 1.59 | 0.666427 | 11.02 | 5.24 | 0.000182 | 0.003517 | 0.691293 | 4246  |
| SH3D19   | 1.59 | 0.665866 | 10.67 | 3.51 | 0.004035 | 0.028245 | 0.08961  | 12073 |
| ISG15    | 1.59 | 0.665591 | 10.53 | 2.55 | 0.024684 | 0.095802 | 0.016453 | 6403  |
| MXD4     | 1.58 | 0.664039 | 11.19 | 3.97 | 0.001725 | 0.015852 | 0.187168 | 8830  |
| SLC16A9  | 1.58 | 0.662732 | 10.46 | 4.81 | 0.000384 | 0.005731 | 0.512362 | 12179 |
| CHD9     | 1.58 | 0.662175 | 9.70  | 3.74 | 0.002646 | 0.021196 | 0.130418 | 2690  |
| ITGA6    | 1.58 | 0.66177  | 9.19  | 5.62 | 9.67E-05 | 0.002364 | 0.809754 | 6423  |
| KIAA1370 | 1.58 | 0.661641 | 9.16  | 5.02 | 0.000263 | 0.004434 | 0.60627  | 6669  |
| SPRY4    | 1.58 | 0.661563 | 9.66  | 3.14 | 0.00824  | 0.045833 | 0.046303 | 12736 |
| SLC16A5  | 1.58 | 0.660693 | 8.92  | 6.15 | 4.13E-05 | 0.001348 | 0.909925 | 12177 |
| RPS6KA3  | 1.58 | 0.659336 | 9.76  | 2.71 | 0.018327 | 0.07815  | 0.021783 | 11577 |
| SEPHS1   | 1.58 | 0.659137 | 10.14 | 5.29 | 0.000166 | 0.003329 | 0.710676 | 11909 |
| APOBEC3F | 1.58 | 0.658899 | 8.36  | 4.48 | 0.000688 | 0.008587 | 0.367596 | 640   |
| CCNI     | 1.58 | 0.658652 | 13.32 | 7.67 | 4.50E-06 | 0.000325 | 0.989559 | 2385  |
| TMEM37   | 1.58 | 0.658615 | 9.06  | 3.02 | 0.010237 | 0.053077 | 0.037753 | 13558 |
| GBA      | 1.58 | 0.657995 | 9.39  | 4.40 | 0.000788 | 0.009368 | 0.336546 | 4965  |
| PLLP     | 1.58 | 0.656517 | 11.63 | 4.57 | 0.000584 | 0.007702 | 0.407194 | 10207 |
| FBXO8    | 1.58 | 0.656492 | 9.48  | 6.35 | 3.05E-05 | 0.001125 | 0.932088 | 4551  |
| PELI1    | 1.58 | 0.656258 | 9.04  | 5.11 | 0.000228 | 0.004055 | 0.640851 | 9888  |
| SCMH1    | 1.57 | 0.653951 | 9.93  | 4.43 | 0.000751 | 0.009082 | 0.34747  | 11777 |
| IL6ST    | 1.57 | 0.653734 | 10.01 | 3.62 | 0.003283 | 0.02464  | 0.107866 | 6015  |
| UBL3     | 1.57 | 0.653432 | 9.94  | 4.48 | 0.000688 | 0.008587 | 0.367777 | 14166 |
| FNDC4    | 1.57 | 0.653041 | 8.98  | 4.97 | 0.000288 | 0.004742 | 0.584076 | 4768  |
| OSTM1    | 1.57 | 0.652936 | 8.01  | 6.21 | 3.78E-05 | 0.00128  | 0.916845 | 9587  |
| RPS23    | 1.57 | 0.652584 | 11.08 | 6.81 | 1.54E-05 | 0.000728 | 0.964871 | 11544 |
| KLHL24   | 1.57 | 0.652357 | 8.73  | 5.46 | 0.000126 | 0.002763 | 0.76541  | 6788  |
| CDH2     | 1.57 | 0.652251 | 8.24  | 3.09 | 0.009001 | 0.048807 | 0.042614 | 2528  |
| F10      | 1.57 | 0.650263 | 10.00 | 3.49 | 0.004231 | 0.029216 | 0.085825 | 4274  |
| NDRG2    | 1.57 | 0.649889 | 9.40  | 5.00 | 0.000275 | 0.004589 | 0.595811 | 9012  |
| CDK8     | 1.57 | 0.64815  | 8.26  | 5.28 | 0.000169 | 0.003353 | 0.707089 | 2548  |
| SLC25A20 | 1.57 | 0.647668 | 9.06  | 5.68 | 8.82E-05 | 0.002234 | 0.823692 | 12218 |
| ARMCX6   | 1.57 | 0.647633 | 9.01  | 5.60 | 0.000101 | 0.002399 | 0.803508 | 782   |
| HIPK2    | 1.57 | 0.647595 | 10.08 | 3.43 | 0.004707 | 0.031373 | 0.077871 | 5529  |
| TIMP1    | 1.56 | 0.645887 | 13.29 | 2.87 | 0.013535 | 0.064015 | 0.029006 | 13373 |
| CYBRD1   | 1.56 | 0.645145 | 8.39  | 4.83 | 0.00037  | 0.005575 | 0.521585 | 3296  |
| ASIP     | 1.56 | 0.645109 | 8.18  | 3.70 | 0.002834 | 0.02234  | 0.122821 | 850   |
| UBE2D3   | 1.56 | 0.644534 | 11.48 | 5.23 | 0.000185 | 0.003553 | 0.687698 | 14120 |
| MAOA     | 1.56 | 0.644269 | 11.74 | 3.95 | 0.00179  | 0.016267 | 0.18163  | 8100  |
| C5orf41  | 1.56 | 0.64409  | 8.51  | 6.25 | 3.55E-05 | 0.001234 | 0.921761 | 1941  |
| IGSF1    | 1.56 | 0.643126 | 8.33  | 5.05 | 0.00025  | 0.004307 | 0.618709 | 6247  |
| PPHLN1   | 1.56 | 0.642909 | 10.53 | 3.99 | 0.00165  | 0.015475 | 0.194087 | 10379 |
| C4orf34  | 1.56 | 0.642354 | 12.19 | 6.02 | 5.11E-05 | 0.001561 | 0.890536 | 1917  |
| TNFSF10  | 1.56 | 0.640354 | 9.57  | 3.54 | 0.003831 | 0.027258 | 0.093903 | 13656 |
| IVNS1ABP | 1.56 | 0.640204 | 8.78  | 6.91 | 1.32E-05 | 0.000665 | 0.96964  | 6459  |
| PANX2    | 1.56 | 0.63897  | 7.90  | 7.13 | 9.59E-06 | 0.000556 | 0.977901 | 9674  |
| TRIM5    | 1.56 | 0.638478 | 9.31  | 5.61 | 9.77E-05 | 0.002364 | 0.808068 | 13848 |
| C2orf30  | 1.56 | 0.638383 | 11.22 | 4.17 | 0.001193 | 0.012354 | 0.250258 | 1845  |
| KATNAL1  | 1.56 | 0.638094 | 9.04  | 6.43 | 2.72E-05 | 0.001051 | 0.939165 | 6504  |
| IGFBP6   | 1.56 | 0.637258 | 8.36  | 5.42 | 0.000136 | 0.002885 | 0.750854 | 6242  |

|           |      |          |       |      |          |          |          |       |
|-----------|------|----------|-------|------|----------|----------|----------|-------|
| JSRP1     | 1.55 | 0.63519  | 8.31  | 6.04 | 4.90E-05 | 0.001532 | 0.89458  | 6487  |
| PAQR9     | 1.55 | 0.634163 | 9.62  | 5.11 | 0.000226 | 0.004033 | 0.642955 | 9690  |
| BOLA2     | 1.55 | 0.632786 | 13.53 | 5.32 | 0.00016  | 0.003241 | 0.718169 | 1243  |
| LOC388610 | 1.55 | 0.631958 | 12.20 | 5.26 | 0.000177 | 0.003446 | 0.697372 | 7157  |
| ZIC2      | 1.55 | 0.631541 | 9.66  | 3.87 | 0.002067 | 0.017856 | 0.161084 | 14837 |
| KIAA0152  | 1.55 | 0.630047 | 10.57 | 3.10 | 0.00874  | 0.047678 | 0.043813 | 6577  |
| BCKDK     | 1.55 | 0.629892 | 11.95 | 7.18 | 8.99E-06 | 0.000536 | 0.979273 | 1149  |
| NCOA7     | 1.55 | 0.62938  | 10.11 | 4.04 | 0.001516 | 0.014596 | 0.20776  | 8998  |
| CRIP1     | 1.55 | 0.629325 | 9.04  | 3.95 | 0.001776 | 0.016178 | 0.18281  | 3084  |
| PEG10     | 1.55 | 0.628816 | 11.19 | 3.90 | 0.001972 | 0.017346 | 0.167595 | 9886  |
| C15orf17  | 1.54 | 0.626291 | 9.63  | 6.94 | 1.26E-05 | 0.00065  | 0.971181 | 1524  |
| CMPK1     | 1.54 | 0.626245 | 11.22 | 6.03 | 4.98E-05 | 0.001535 | 0.893066 | 2856  |
| BTF3L4    | 1.54 | 0.623608 | 9.80  | 5.88 | 6.38E-05 | 0.00178  | 0.86651  | 1315  |
| CITED4    | 1.54 | 0.623546 | 10.09 | 4.24 | 0.001052 | 0.011357 | 0.274739 | 2766  |
| C10orf65  | 1.54 | 0.623449 | 10.16 | 3.87 | 0.00209  | 0.01798  | 0.159621 | 1375  |
| PAFAH1B1  | 1.54 | 0.623311 | 9.28  | 5.29 | 0.000167 | 0.00334  | 0.709159 | 9639  |
| GPR126    | 1.54 | 0.622865 | 10.51 | 3.27 | 0.006425 | 0.038813 | 0.058423 | 5220  |
| MAP2K1    | 1.54 | 0.622388 | 10.70 | 4.30 | 0.000944 | 0.010529 | 0.296993 | 8107  |
| CHST13    | 1.54 | 0.622138 | 11.98 | 3.50 | 0.004124 | 0.028666 | 0.087857 | 2737  |
| RNASE4    | 1.54 | 0.620745 | 12.78 | 3.12 | 0.008458 | 0.046675 | 0.045182 | 11317 |
| GABARAP   | 1.54 | 0.620686 | 8.40  | 6.62 | 2.04E-05 | 0.00089  | 0.953857 | 4895  |
| ACSM3     | 1.54 | 0.620637 | 8.67  | 5.73 | 8.09E-05 | 0.002118 | 0.83611  | 175   |
| RPL9      | 1.54 | 0.62025  | 13.19 | 4.66 | 0.000497 | 0.006917 | 0.446769 | 11509 |
| STEAP1    | 1.54 | 0.619217 | 11.66 | 3.57 | 0.003631 | 0.026351 | 0.098548 | 8435  |
| ARL1      | 1.54 | 0.618793 | 10.63 | 5.68 | 8.75E-05 | 0.002222 | 0.824789 | 741   |
| LOC653506 | 1.54 | 0.618605 | 9.81  | 5.85 | 6.63E-05 | 0.001827 | 0.861821 | 7703  |
| REEP5     | 1.53 | 0.617283 | 11.36 | 3.83 | 0.002252 | 0.018883 | 0.149842 | 11170 |
| CD302     | 1.53 | 0.617215 | 8.48  | 3.64 | 0.003199 | 0.024297 | 0.110378 | 2436  |
| MLF2      | 1.53 | 0.616082 | 9.92  | 5.13 | 0.000221 | 0.003967 | 0.64813  | 8487  |
| RAB17     | 1.53 | 0.615846 | 11.30 | 2.94 | 0.011836 | 0.05835  | 0.032924 | 10879 |
| ZDHHC16   | 1.53 | 0.615689 | 12.33 | 6.71 | 1.77E-05 | 0.000799 | 0.959621 | 14775 |
| OPTN      | 1.53 | 0.61552  | 9.95  | 5.13 | 0.000218 | 0.003952 | 0.650709 | 9531  |
| RBKS      | 1.53 | 0.615275 | 9.37  | 3.41 | 0.004908 | 0.032126 | 0.07495  | 11069 |
| RAVER2    | 1.53 | 0.615253 | 8.37  | 4.50 | 0.000654 | 0.00828  | 0.379901 | 11051 |
| ZNF25     | 1.53 | 0.615127 | 8.25  | 5.73 | 8.16E-05 | 0.002128 | 0.834803 | 14938 |
| C17orf90  | 1.53 | 0.614842 | 11.53 | 2.71 | 0.018285 | 0.078058 | 0.021831 | 1606  |
| PPM1F     | 1.53 | 0.614732 | 9.74  | 4.57 | 0.000578 | 0.007671 | 0.40966  | 10407 |
| FBXO21    | 1.53 | 0.614499 | 8.79  | 7.33 | 7.27E-06 | 0.000467 | 0.983196 | 4520  |
| DBN1      | 1.53 | 0.61375  | 10.53 | 3.59 | 0.003467 | 0.025558 | 0.102733 | 3357  |
| TOMM40L   | 1.53 | 0.613382 | 9.07  | 5.91 | 6.05E-05 | 0.001713 | 0.872518 | 13697 |
| GSTM3     | 1.53 | 0.611562 | 8.30  | 6.80 | 1.54E-05 | 0.000729 | 0.964746 | 5319  |
| HBP1      | 1.53 | 0.611527 | 8.83  | 6.47 | 2.54E-05 | 0.001007 | 0.942932 | 5425  |
| FAM24B    | 1.53 | 0.611358 | 8.45  | 2.57 | 0.023759 | 0.09336  | 0.017055 | 4389  |
| IFI35     | 1.53 | 0.611217 | 9.65  | 5.25 | 0.00018  | 0.003501 | 0.693093 | 6197  |
| LIN28B    | 1.53 | 0.610927 | 11.27 | 4.41 | 0.000778 | 0.009306 | 0.339405 | 6983  |
| CMPK1     | 1.53 | 0.610733 | 11.22 | 6.00 | 5.29E-05 | 0.0016   | 0.886989 | 2857  |
| SPI10     | 1.52 | 0.608621 | 9.69  | 3.72 | 0.002736 | 0.021701 | 0.126668 | 12652 |
| TMEM41A   | 1.52 | 0.607263 | 9.78  | 4.41 | 0.000769 | 0.009232 | 0.342104 | 13563 |
| SLC30A7   | 1.52 | 0.605542 | 10.50 | 4.32 | 0.000914 | 0.010309 | 0.303969 | 12293 |
| CLDN11    | 1.52 | 0.605373 | 9.72  | 2.78 | 0.016145 | 0.071483 | 0.024554 | 2794  |
| LOC653888 | 1.52 | 0.605306 | 9.90  | 6.27 | 3.42E-05 | 0.001215 | 0.924272 | 7728  |
| SENP7     | 1.52 | 0.60528  | 8.88  | 4.49 | 0.000675 | 0.008473 | 0.372274 | 11905 |



|               |       |             |       |       |             |             |             |       |
|---------------|-------|-------------|-------|-------|-------------|-------------|-------------|-------|
| CCNDBP1       | 1.52  | 0.604708    | 11.91 | 6.78  | 1.60E-05    | 0.000745    | 0.963558    | 2374  |
| SLC6A4        | 1.52  | 0.604262    | 8.69  | 4.48  | 0.000683    | 0.008532    | 0.369477    | 12390 |
| ASB13         | 1.52  | 0.603944    | 9.21  | 6.63  | 2.00E-05    | 0.000883    | 0.954545    | 827   |
| ST3GAL6       | 1.52  | 0.603006    | 9.53  | 5.28  | 0.000171    | 0.003372    | 0.704921    | 12833 |
| PDGFRB        | 1.52  | 0.602764    | 8.28  | 4.06  | 0.001449    | 0.01409     | 0.215341    | 9839  |
| CX3CL1        | 1.52  | 0.602586    | 10.94 | 4.98  | 0.000282    | 0.00468     | 0.589077    | 3261  |
| C4orf34       | 1.52  | 0.602297    | 10.55 | 4.87  | 0.000341    | 0.005293    | 0.542027    | 1916  |
| C20orf121     | 1.52  | 0.601704    | 9.92  | 3.98  | 0.001679    | 0.015604    | 0.191367    | 1755  |
| KIAA1267      | 1.52  | 0.601415    | 10.42 | 5.60  | 0.000101    | 0.002399    | 0.803086    | 6658  |
| RETSAT        | 1.52  | 0.601229    | 9.49  | 5.46  | 0.000125    | 0.002763    | 0.765584    | 11188 |
| SLC35F2       | 1.52  | 0.600663    | 9.01  | 3.75  | 0.002592    | 0.020867    | 0.132749    | 12318 |
| STAT2         | 1.52  | 0.600523    | 10.31 | 6.42  | 2.73E-05    | 0.001054    | 0.938884    | 12872 |
| ANKRD46       | 1.51  | 0.59927     | 10.12 | 5.78  | 7.48E-05    | 0.00199     | 0.846741    | 544   |
| PAPD1         | 1.51  | 0.596945    | 10.30 | 7.06  | 1.06E-05    | 0.000596    | 0.975534    | 9677  |
| ITM2B         | 1.51  | 0.596485    | 12.93 | 6.99  | 1.18E-05    | 0.000629    | 0.972903    | 6444  |
| FTCD          | 1.51  | 0.596334    | 10.41 | 3.17  | 0.007672    | 0.043638    | 0.04951     | 4821  |
| ZDHHC16       | 1.51  | 0.595802    | 10.06 | 5.93  | 5.91E-05    | 0.001697    | 0.875281    | 14774 |
| GOLT1A        | 1.51  | 0.594938    | 11.42 | 4.10  | 0.001359    | 0.013547    | 0.226447    | 5173  |
| ARPC2         | 1.51  | 0.594805    | 13.00 | 5.80  | 7.22E-05    | 0.001935    | 0.851282    | 789   |
| RPS29         | 1.51  | 0.594397    | 10.23 | 4.88  | 0.000335    | 0.005229    | 0.546613    | 11563 |
| SH3BGR3       | 1.51  | 0.594187    | 10.52 | 2.72  | 0.018156    | 0.077637    | 0.021977    | 12069 |
| ARRB1         | 1.51  | 0.594039    | 8.73  | 7.03  | 1.10E-05    | 0.000609    | 0.974668    | 797   |
| PRCP          | 1.51  | 0.593793    | 12.44 | 4.88  | 0.000337    | 0.005251    | 0.544951    | 10499 |
| UBASH3B       | 1.51  | 0.593691    | 11.12 | 3.37  | 0.005294    | 0.033802    | 0.069902    | 12931 |
| HEBP2         | 1.51  | 0.59325     | 11.88 | 4.45  | 0.000721    | 0.008871    | 0.356706    | 5465  |
| SPIRE1        | 1.51  | 0.591299    | 11.14 | 3.96  | 0.001744    | 0.015944    | 0.185554    | 12717 |
| FOXC1         | 1.51  | 0.591152    | 10.03 | 3.68  | 0.00295     | 0.022965    | 0.118584    | 4779  |
| C3orf60       | 1.51  | 0.590803    | 11.94 | 3.79  | 0.002399    | 0.019713    | 0.141958    | 1893  |
| FAM14A        | 1.51  | 0.590207    | 8.47  | 5.49  | 0.00012     | 0.002709    | 0.773007    | 4369  |
| PI4KA         | 1.51  | 0.590041    | 10.78 | 5.03  | 0.000258    | 0.004384    | 0.610608    | 10085 |
| PRKAR1A       | 1.51  | 0.589891    | 12.66 | 4.17  | 0.001203    | 0.012389    | 0.248697    | 10542 |
| ZFP90         | 1.50  | 0.589214    | 9.96  | 4.57  | 0.000579    | 0.007676    | 0.409058    | 14811 |
| C5orf13       | 1.50  | 0.589169    | 11.44 | 4.62  | 0.000537    | 0.007311    | 0.427807    | 1923  |
| ANPEP         | 1.50  | 0.589141    | 9.96  | 5.23  | 0.000185    | 0.003554    | 0.687412    | 560   |
| TWSG1         | 1.50  | 0.589123    | 11.34 | 6.52  | 2.35E-05    | 0.000968    | 0.947063    | 14046 |
| JARID2        | 1.50  | 0.588556    | 9.14  | 6.89  | 1.36E-05    | 0.000668    | 0.968919    | 6470  |
| MCEE          | 1.50  | 0.588424    | 10.36 | 2.79  | 0.015942    | 0.070811    | 0.024849    | 8253  |
| TNFSF4        | 1.50  | 0.587369    | 8.46  | 3.69  | 0.002902    | 0.022737    | 0.120277    | 13661 |
| AES           | 1.50  | 0.587337    | 11.02 | 5.10  | 0.000232    | 0.004096    | 0.63647     | 285   |
| tcag7.1260    | 1.50  | 0.587039    | 10.49 | 2.90  | 0.012956    | 0.062049    | 0.030228    | 7282  |
| C14orf149     | 1.50  | 0.586754    | 8.54  | 4.87  | 0.000345    | 0.005316    | 0.539414    | 1493  |
| C2            | 1.50  | 0.586289    | 9.15  | 4.37  | 0.000832    | 0.009729    | 0.32444     | 1748  |
| CLNS1A        | 1.50  | 0.585888    | 12.11 | 6.02  | 5.08E-05    | 0.001556    | 0.891027    | 2833  |
| <b>DIMTIL</b> | -1.50 | -0.58564537 | 10.87 | -5.74 | 7.97E-05    | 0.002100224 | 0.838080564 | 3599  |
| TBX2          | -1.50 | -0.58586143 | 8.44  | -4.06 | 0.001465944 | 0.014223945 | 0.213352682 | 13181 |
| C17orf53      | -1.50 | -0.58680253 | 9.56  | -5.24 | 0.00018363  | 0.003536498 | 0.689290012 | 1580  |
| WTAP          | -1.50 | -0.5884207  | 9.65  | -4.65 | 0.000504175 | 0.006983476 | 0.443410392 | 14607 |
| BCCIP         | -1.50 | -0.58955723 | 10.07 | -3.62 | 0.003314455 | 0.024782052 | 0.106940269 | 1142  |
| SNRPC         | -1.51 | -0.59032215 | 11.71 | -4.52 | 0.000631132 | 0.008069281 | 0.38826856  | 12548 |
| C15orf23      | -1.51 | -0.59124689 | 9.63  | -4.02 | 0.001560264 | 0.014896666 | 0.203016682 | 1526  |
| FANCI         | -1.51 | -0.59186214 | 9.54  | -3.19 | 0.00741001  | 0.042699235 | 0.051144674 | 4471  |
| NUP85         | -1.51 | -0.5920348  | 10.60 | -4.87 | 0.000341457 | 0.005292924 | 0.541773594 | 9447  |

|                |       |             |       |       |             |             |             |       |
|----------------|-------|-------------|-------|-------|-------------|-------------|-------------|-------|
| WTAP           | -1.51 | -0.59305269 | 11.18 | -4.55 | 0.000598971 | 0.00782871  | 0.400905614 | 14604 |
| LMCD1          | -1.51 | -0.59388444 | 9.45  | -3.26 | 0.006553754 | 0.039309451 | 0.057355372 | 7013  |
| CFL2           | -1.51 | -0.59434507 | 9.07  | -5.96 | 5.59E-05    | 0.001653157 | 0.881215198 | 2657  |
| MSH6           | -1.51 | -0.59524543 | 11.41 | -4.79 | 0.000393964 | 0.005851149 | 0.505626427 | 8717  |
| CDC25C         | -1.51 | -0.59576525 | 8.81  | -4.97 | 0.000289792 | 0.004763142 | 0.582693852 | 2487  |
| SDPR           | -1.51 | -0.59620163 | 11.08 | -2.93 | 0.012234662 | 0.059488462 | 0.031909639 | 11837 |
| CYP51A1        | -1.51 | -0.59688162 | 10.37 | -4.70 | 0.000460671 | 0.006536393 | 0.466062231 | 3330  |
| SCD            | -1.51 | -0.5972497  | 13.80 | -2.91 | 0.012612918 | 0.060881277 | 0.031005087 | 11769 |
| ENSA           | -1.51 | -0.59767817 | 9.85  | -4.31 | 0.000924486 | 0.010399106 | 0.301477073 | 4106  |
| ADFP           | -1.51 | -0.59873799 | 14.48 | -3.46 | 0.004502611 | 0.030415637 | 0.081102536 | 250   |
| ZWILCH         | -1.51 | -0.59896674 | 11.17 | -5.73 | 8.05E-05    | 0.002112918 | 0.83677086  | 15243 |
| <b>SLC44A2</b> | -1.51 | -0.59930298 | 9.03  | -3.62 | 0.003275412 | 0.024622897 | 0.108074776 | 12367 |
| CD24           | -1.52 | -0.59936665 | 14.11 | -4.10 | 0.001363672 | 0.013557775 | 0.225820626 | 2428  |
| ABCB9          | -1.52 | -0.59966434 | 9.63  | -4.27 | 0.000988962 | 0.010883574 | 0.287347544 | 41    |
| SDHB           | -1.52 | -0.60045362 | 11.85 | -6.57 | 2.17E-05    | 0.000925949 | 0.950854173 | 11833 |
| TDG            | -1.52 | -0.60107372 | 10.92 | -5.59 | 0.000101346 | 0.002404083 | 0.802236808 | 13225 |
| FKBP14         | -1.52 | -0.60130322 | 9.97  | -7.73 | 4.16E-06    | 0.000311076 | 0.990351876 | 4641  |
| HCP5           | -1.52 | -0.6016526  | 9.91  | -3.24 | 0.006800993 | 0.040254382 | 0.055409888 | 5440  |
| TNFRSF19       | -1.52 | -0.60210286 | 8.76  | -6.32 | 3.20E-05    | 0.00115075  | 0.928958456 | 13652 |
| CTDSPL2        | -1.52 | -0.6021687  | 8.47  | -6.60 | 2.07E-05    | 0.000901056 | 0.953031534 | 3193  |
| NES            | -1.52 | -0.60376978 | 8.64  | -4.71 | 0.000453176 | 0.006476697 | 0.470199146 | 9087  |
| PDE3B          | -1.52 | -0.6040331  | 9.05  | -4.68 | 0.000475157 | 0.006685731 | 0.458268965 | 9822  |
| ZFP36L2        | -1.52 | -0.60422324 | 9.48  | -4.40 | 0.000782589 | 0.009340241 | 0.338045337 | 14808 |
| FTHL11         | -1.52 | -0.60466669 | 10.71 | -3.28 | 0.0062196   | 0.03791669  | 0.060216603 | 4824  |
| RFC4           | -1.52 | -0.60473606 | 11.14 | -5.46 | 0.000125524 | 0.0027634   | 0.765497041 | 11203 |
| RAD51C         | -1.52 | -0.60521441 | 12.02 | -4.11 | 0.001323517 | 0.013270106 | 0.231124012 | 10970 |
| HELLS          | -1.52 | -0.60555333 | 8.95  | -5.53 | 0.000112515 | 0.002580748 | 0.784850297 | 5470  |
| C3             | -1.52 | -0.60592959 | 9.20  | -5.12 | 0.000222821 | 0.004003167 | 0.64576107  | 1862  |
| MYH9           | -1.52 | -0.6066406  | 12.38 | -3.40 | 0.004979033 | 0.032358408 | 0.073963997 | 8850  |
| SCN9A          | -1.52 | -0.60667053 | 9.15  | -5.35 | 0.000150212 | 0.003092025 | 0.731203331 | 11787 |
| FOXQ1          | -1.52 | -0.60679538 | 12.84 | -4.14 | 0.001253076 | 0.012716676 | 0.241055426 | 4796  |
| MCM6           | -1.52 | -0.60710147 | 11.14 | -4.45 | 0.000719418 | 0.008863723 | 0.357330188 | 8268  |
| KLF6           | -1.52 | -0.60857741 | 12.99 | -3.62 | 0.003280012 | 0.02463981  | 0.107939851 | 6766  |
| ID2            | -1.53 | -0.61076653 | 12.24 | -3.51 | 0.004091969 | 0.028512929 | 0.088477745 | 6175  |
| ELOVL6         | -1.53 | -0.61165086 | 8.95  | -4.39 | 0.000800981 | 0.009478166 | 0.332814526 | 4078  |
| CKAP5          | -1.53 | -0.61181578 | 11.82 | -3.99 | 0.001652634 | 0.015483804 | 0.193822515 | 2771  |
| SPC24          | -1.53 | -0.61208238 | 9.68  | -3.13 | 0.008295937 | 0.046013794 | 0.046009602 | 12687 |
| CDC25C         | -1.53 | -0.61216098 | 9.11  | -3.84 | 0.002190656 | 0.018512315 | 0.153393157 | 2488  |
| CDC25C         | -1.53 | -0.61260049 | 8.80  | -4.91 | 0.000321363 | 0.005111314 | 0.556995017 | 2489  |
| ERMP1          | -1.53 | -0.61298428 | 9.02  | -3.57 | 0.00366055  | 0.02645356  | 0.097843341 | 4185  |
| GCUD2          | -1.53 | -0.61309227 | 9.53  | -4.50 | 0.000658693 | 0.00831652  | 0.378052866 | 5000  |
| LSS            | -1.53 | -0.61331525 | 9.49  | -3.58 | 0.003541185 | 0.025905851 | 0.100799136 | 7986  |
| STIL           | -1.53 | -0.61514717 | 10.37 | -5.07 | 0.000241299 | 0.004220792 | 0.627058067 | 12893 |
| GPC6           | -1.53 | -0.61727987 | 9.61  | -4.25 | 0.001024634 | 0.011139516 | 0.280083954 | 5861  |
| RNF103         | -1.53 | -0.61746661 | 11.11 | -3.77 | 0.002504827 | 0.020317011 | 0.13675885  | 11328 |
| PTTG1          | -1.53 | -0.61772228 | 12.62 | -4.44 | 0.000734911 | 0.008960513 | 0.352400441 | 10802 |
| LIPG           | -1.54 | -0.61874437 | 8.22  | -6.20 | 3.82E-05    | 0.001290236 | 0.916053854 | 6996  |
| GBAS           | -1.54 | -0.61897121 | 9.71  | -5.69 | 8.61E-05    | 0.00219135  | 0.827269999 | 4967  |
| POLQ           | -1.54 | -0.61968278 | 8.99  | -5.65 | 9.18E-05    | 0.002303071 | 0.817688041 | 10296 |
| NEIL3          | -1.54 | -0.61984507 | 8.19  | -8.86 | 9.69E-07    | 0.000130824 | 0.997734777 | 9072  |
| KLC1           | -1.54 | -0.6200368  | 10.13 | -5.26 | 0.000174789 | 0.003413646 | 0.699914882 | 6753  |
| FANCG          | -1.54 | -0.62110225 | 9.71  | -3.22 | 0.007057623 | 0.041242447 | 0.053527395 | 4470  |

|          |       |             |       |       |             |             |             |       |
|----------|-------|-------------|-------|-------|-------------|-------------|-------------|-------|
| SAMD4A   | -1.54 | -0.62285331 | 8.48  | -5.48 | 0.000121772 | 0.002735485 | 0.770983106 | 11709 |
| FTHL8    | -1.54 | -0.62434608 | 13.73 | -5.08 | 0.00023929  | 0.004200106 | 0.629039501 | 4832  |
| PRKDC    | -1.54 | -0.62458203 | 10.34 | -3.02 | 0.010175778 | 0.052792906 | 0.037968371 | 10558 |
| GPR56    | -1.54 | -0.62609757 | 10.47 | -3.86 | 0.002108432 | 0.018108061 | 0.158440357 | 5231  |
| HELLS    | -1.54 | -0.62640094 | 10.11 | -4.59 | 0.000560573 | 0.007520162 | 0.417107343 | 5471  |
| MRPS17   | -1.55 | -0.62787901 | 12.16 | -6.33 | 3.17E-05    | 0.001144517 | 0.92963529  | 8677  |
| NUP35    | -1.55 | -0.62804602 | 9.13  | -7.79 | 3.84E-06    | 0.000292636 | 0.991098466 | 9436  |
| RFC3     | -1.55 | -0.62865915 | 9.31  | -6.16 | 4.10E-05    | 0.001347007 | 0.910397346 | 11200 |
| SKP2     | -1.55 | -0.62923409 | 10.64 | -2.97 | 0.011306114 | 0.056746351 | 0.034378089 | 12153 |
| ZNF598   | -1.55 | -0.63293004 | 10.39 | -7.02 | 1.13E-05    | 0.000611737 | 0.974092354 | 15104 |
| RFC4     | -1.55 | -0.63406245 | 11.06 | -4.87 | 0.000343903 | 0.005309261 | 0.53997641  | 11202 |
| PGBD1    | -1.55 | -0.63425408 | 8.57  | -6.97 | 1.21E-05    | 0.000636127 | 0.972246274 | 9938  |
| RDX      | -1.55 | -0.63508162 | 10.62 | -5.29 | 0.00016682  | 0.003334874 | 0.709769705 | 11158 |
| SEMA6A   | -1.55 | -0.63601626 | 10.44 | -3.63 | 0.003239089 | 0.024500087 | 0.109152256 | 11896 |
| GPR56    | -1.56 | -0.63720756 | 10.14 | -4.63 | 0.000526678 | 0.007191965 | 0.432529873 | 5232  |
| AMZ2     | -1.56 | -0.63733232 | 12.50 | -7.91 | 3.26E-06    | 0.00026034  | 0.99243193  | 483   |
| INCENP   | -1.56 | -0.63741675 | 9.22  | -4.44 | 0.000738284 | 0.008987265 | 0.351345223 | 6322  |
| IER5     | -1.56 | -0.63747696 | 8.72  | -5.22 | 0.00018681  | 0.003563845 | 0.685545366 | 6192  |
| PTTG1    | -1.56 | -0.63819923 | 11.40 | -3.36 | 0.005349785 | 0.033971805 | 0.069231088 | 10801 |
| BXDC2    | -1.56 | -0.63876083 | 13.12 | -8.22 | 2.17E-06    | 0.000220373 | 0.994960151 | 1339  |
| RCC2     | -1.56 | -0.63914206 | 11.83 | -4.15 | 0.001238361 | 0.012626154 | 0.243238732 | 11135 |
| STXBP6   | -1.56 | -0.63971683 | 10.93 | -4.92 | 0.000312396 | 0.005010494 | 0.564063557 | 12959 |
| NOLC1    | -1.56 | -0.64180411 | 10.91 | -4.38 | 0.000815548 | 0.009605835 | 0.328784454 | 9253  |
| MCM4     | -1.56 | -0.64181603 | 9.60  | -8.04 | 2.76E-06    | 0.000242645 | 0.993591557 | 8265  |
| CITED2   | -1.56 | -0.64207382 | 9.89  | -5.82 | 7.04E-05    | 0.00189429  | 0.854466323 | 2765  |
| CRLS1    | -1.56 | -0.6429134  | 12.82 | -5.82 | 7.03E-05    | 0.00189429  | 0.854721802 | 3096  |
| SLC47A1  | -1.56 | -0.64304529 | 10.84 | -2.88 | 0.01329235  | 0.063214923 | 0.029505801 | 12375 |
| SGOL1    | -1.56 | -0.64310641 | 8.51  | -5.75 | 7.82E-05    | 0.002067975 | 0.840672744 | 12052 |
| SPPI     | -1.56 | -0.64383739 | 14.48 | -5.04 | 0.000254456 | 0.004351139 | 0.614377257 | 12726 |
| MBD2     | -1.56 | -0.64577634 | 7.80  | -8.80 | 1.04E-06    | 0.000138042 | 0.997564012 | 8222  |
| CSEIL    | -1.57 | -0.64900374 | 12.62 | -5.51 | 0.000115521 | 0.002633847 | 0.780295122 | 3133  |
| LPCAT1   | -1.57 | -0.64904688 | 9.50  | -5.17 | 0.000204633 | 0.003796851 | 0.665272229 | 7890  |
| MNS1     | -1.57 | -0.64913779 | 8.31  | -8.37 | 1.80E-06    | 0.000194585 | 0.99581316  | 8520  |
| S100A4   | -1.57 | -0.65345407 | 9.78  | -3.15 | 0.0080068   | 0.045015749 | 0.047566235 | 11687 |
| PAICS    | -1.57 | -0.65382796 | 8.40  | -8.28 | 2.00E-06    | 0.000210702 | 0.995340251 | 9649  |
| ADD3     | -1.58 | -0.65543337 | 9.30  | -6.38 | 2.93E-05    | 0.001099967 | 0.934657975 | 247   |
| PLK4     | -1.58 | -0.65546307 | 9.91  | -5.50 | 0.00011789  | 0.002675853 | 0.776741225 | 10205 |
| CUL4A    | -1.58 | -0.65600693 | 10.84 | -4.86 | 0.000347131 | 0.005337489 | 0.53762281  | 3247  |
| NOL5A    | -1.58 | -0.65618506 | 13.26 | -3.79 | 0.00238776  | 0.019654882 | 0.142515525 | 9240  |
| RAD51C   | -1.58 | -0.65673038 | 10.98 | -8.15 | 2.37E-06    | 0.00023194  | 0.994488009 | 10971 |
| PHF14    | -1.58 | -0.6570198  | 10.06 | -7.02 | 1.13E-05    | 0.000611737 | 0.974096373 | 9976  |
| C9orf140 | -1.58 | -0.65730518 | 9.56  | -3.65 | 0.003112704 | 0.023858331 | 0.113076139 | 2055  |
| MCM3     | -1.58 | -0.65837863 | 10.36 | -6.18 | 3.94E-05    | 0.001308845 | 0.913708588 | 8261  |
| MATN3    | -1.58 | -0.65917895 | 12.10 | -3.29 | 0.006098616 | 0.037328329 | 0.061325376 | 8210  |
| KITLG    | -1.58 | -0.6603594  | 9.17  | -5.40 | 0.000139865 | 0.002938513 | 0.745206343 | 6751  |
| ELOVL6   | -1.58 | -0.66334102 | 10.80 | -3.85 | 0.002154997 | 0.018372344 | 0.155541782 | 4077  |
| GLDC     | -1.58 | -0.66378615 | 12.81 | -5.25 | 0.000179282 | 0.003483555 | 0.694475376 | 5072  |
| POLE2    | -1.59 | -0.66527824 | 9.90  | -5.04 | 0.000255707 | 0.004367628 | 0.613198076 | 10289 |
| CDCA2    | -1.59 | -0.66556268 | 8.82  | -5.64 | 9.34E-05    | 0.002327347 | 0.815093824 | 2518  |
| SAC3D1   | -1.59 | -0.66809839 | 11.02 | -5.51 | 0.0001164   | 0.002649932 | 0.778972304 | 11698 |
| CENPE    | -1.59 | -0.66843255 | 9.36  | -5.40 | 0.000138921 | 0.00292372  | 0.746509867 | 2593  |
| DC2      | -1.59 | -0.66907671 | 12.72 | -4.17 | 0.001184962 | 0.012320393 | 0.251505672 | 3368  |

|                |       |             |       |       |             |             |             |       |
|----------------|-------|-------------|-------|-------|-------------|-------------|-------------|-------|
| BUB3           | -1.59 | -0.66910939 | 11.88 | -6.55 | 2.26E-05    | 0.000950414 | 0.949056405 | 1333  |
| CDCA4          | -1.59 | -0.66919918 | 9.11  | -7.22 | 8.40E-06    | 0.000514291 | 0.980625656 | 2522  |
| SELI           | -1.59 | -0.66963681 | 9.10  | -6.16 | 4.11E-05    | 0.001347007 | 0.910311793 | 11881 |
| NEK2           | -1.59 | -0.67072713 | 8.52  | -7.46 | 6.05E-06    | 0.000406513 | 0.985999793 | 9076  |
| CENPI          | -1.59 | -0.67296701 | 8.19  | -9.47 | 4.64E-07    | 9.08E-05    | 0.998905421 | 2596  |
| DHRS2          | -1.60 | -0.67364001 | 14.52 | -6.15 | 4.14E-05    | 0.001348404 | 0.909691288 | 3550  |
| UNG            | -1.60 | -0.67413688 | 12.12 | -6.59 | 2.11E-05    | 0.000907996 | 0.952292389 | 14263 |
| RPL7A          | -1.60 | -0.67436174 | 8.75  | -6.05 | 4.83E-05    | 0.001521533 | 0.895965708 | 12529 |
| C20orf19       | -1.60 | -0.67455981 | 8.80  | -3.87 | 0.0020584   | 0.01780872  | 0.161678148 | 1762  |
| EXOSC9         | -1.60 | -0.67456731 | 10.28 | -5.18 | 0.000201796 | 0.003780297 | 0.668420244 | 4263  |
| CENPM          | -1.60 | -0.67533885 | 9.01  | -5.03 | 0.000259599 | 0.004394751 | 0.609556072 | 2602  |
| FILIP1L        | -1.60 | -0.67618755 | 10.76 | -3.21 | 0.007092874 | 0.041312081 | 0.053278915 | 4631  |
| KRT8           | -1.60 | -0.67752521 | 11.82 | -4.07 | 0.001446526 | 0.014089658 | 0.215612728 | 6830  |
| NAP1L4         | -1.60 | -0.67790801 | 11.93 | -7.34 | 7.14E-06    | 0.000461668 | 0.983490828 | 8919  |
| MCM7           | -1.60 | -0.6779436  | 8.89  | -5.90 | 6.19E-05    | 0.001742905 | 0.86993861  | 8269  |
| MPHOSPH1       | -1.60 | -0.67826848 | 10.96 | -4.37 | 0.000837077 | 0.009761424 | 0.323003519 | 8557  |
| C18orf54       | -1.60 | -0.67926244 | 8.91  | -7.96 | 3.07E-06    | 0.000251591 | 0.992875916 | 1620  |
| DLAT           | -1.60 | -0.67962819 | 10.56 | -6.33 | 3.14E-05    | 0.001136343 | 0.930269838 | 3630  |
| MCM10          | -1.60 | -0.67974582 | 8.79  | -6.52 | 2.36E-05    | 0.000968877 | 0.946739386 | 8258  |
| KLHL22         | -1.60 | -0.68018411 | 9.26  | -4.48 | 0.000678218 | 0.008493311 | 0.371133947 | 6786  |
| RFC5           | -1.60 | -0.68157541 | 10.62 | -4.53 | 0.000623276 | 0.008002381 | 0.391281651 | 11204 |
| DBT            | -1.60 | -0.68211092 | 10.18 | -6.06 | 4.80E-05    | 0.001519666 | 0.896472488 | 3367  |
| BUB1B          | -1.61 | -0.68335071 | 8.76  | -6.33 | 3.14E-05    | 0.001136343 | 0.93026547  | 1329  |
| PITRM1         | -1.61 | -0.68360375 | 10.02 | -5.82 | 6.97E-05    | 0.001884274 | 0.855800389 | 10111 |
| ALS2CR4        | -1.61 | -0.68427762 | 9.75  | -6.75 | 1.67E-05    | 0.000767997 | 0.962017602 | 461   |
| FILIP1L        | -1.61 | -0.68560644 | 11.10 | -3.55 | 0.003733723 | 0.026800223 | 0.096116322 | 4630  |
| PPP2R1B        | -1.61 | -0.68573729 | 9.53  | -8.12 | 2.48E-06    | 0.000232716 | 0.994224862 | 10449 |
| DHRS2          | -1.61 | -0.68689964 | 13.56 | -4.35 | 0.000861079 | 0.009912702 | 0.31679318  | 3549  |
| TLE1           | -1.61 | -0.68813852 | 9.35  | -7.68 | 4.44E-06    | 0.000324323 | 0.989697732 | 13398 |
| ACOX1          | -1.61 | -0.6897361  | 10.50 | -5.07 | 0.000243931 | 0.004252213 | 0.624479682 | 146   |
| SQSTM1         | -1.61 | -0.69048835 | 12.60 | -4.10 | 0.001360652 | 0.013547013 | 0.226211007 | 12759 |
| SOCS2          | -1.61 | -0.6910775  | 8.38  | -2.68 | 0.019574817 | 0.08184613  | 0.020470347 | 12607 |
| VWCE           | -1.62 | -0.6916736  | 9.49  | -4.65 | 0.000505148 | 0.006985511 | 0.44292868  | 14467 |
| MVD            | -1.62 | -0.69192451 | 8.73  | -8.07 | 2.66E-06    | 0.000241793 | 0.993812287 | 8822  |
| CDCA7          | -1.62 | -0.69258689 | 10.66 | -5.00 | 0.000273113 | 0.004572762 | 0.597237866 | 2524  |
| RNASEH2A       | -1.62 | -0.69759053 | 9.42  | -5.15 | 0.000213742 | 0.003903236 | 0.655357749 | 11320 |
| NCAPG2         | -1.63 | -0.70100351 | 8.97  | -5.72 | 8.27E-05    | 0.002138991 | 0.832901508 | 8974  |
| MCM2           | -1.63 | -0.70321803 | 10.01 | -6.37 | 2.94E-05    | 0.001103051 | 0.934331543 | 8260  |
| AKAP7          | -1.63 | -0.70394902 | 9.94  | -3.96 | 0.001742856 | 0.015943787 | 0.185613655 | 365   |
| PTTG3          | -1.63 | -0.70405899 | 11.46 | -3.77 | 0.002505494 | 0.020317011 | 0.136727391 | 10806 |
| NOL5A          | -1.63 | -0.70429913 | 13.32 | -6.51 | 2.40E-05    | 0.00097279  | 0.94598049  | 9238  |
| SFRS14         | -1.63 | -0.70493604 | 8.93  | -5.47 | 0.000123154 | 0.002746295 | 0.768954128 | 12015 |
| SLC11A2        | -1.63 | -0.70535593 | 11.14 | -3.75 | 0.002592335 | 0.02086652  | 0.132752091 | 12163 |
| SNAR-A53129250 | -1.64 | -0.70930032 | 14.66 | -5.04 | 0.000257161 | 0.004384499 | 0.6118326   | 6051  |
| NUP155         | -1.64 | -0.71049183 | 11.94 | -5.95 | 5.65E-05    | 0.00165416  | 0.880030494 | 9429  |
| TXNRD1         | -1.64 | -0.7105828  | 11.36 | -5.22 | 0.000189737 | 0.003601624 | 0.682133209 | 14069 |
| LHX6           | -1.64 | -0.71063684 | 8.81  | -3.56 | 0.003703881 | 0.026648725 | 0.096813169 | 6965  |
| HP             | -1.64 | -0.7128076  | 10.00 | -2.61 | 0.022196141 | 0.089047275 | 0.018183144 | 5678  |
| HJURP          | -1.64 | -0.71352016 | 9.10  | -6.41 | 2.77E-05    | 0.001060289 | 0.93807826  | 5563  |
| HRSP12         | -1.64 | -0.71379572 | 8.83  | -4.44 | 0.000730981 | 0.008934016 | 0.35363819  | 5702  |
| TFRC           | -1.64 | -0.71616156 | 13.20 | -3.85 | 0.00213773  | 0.018256881 | 0.156604155 | 13279 |
| SFT2D1         | -1.64 | -0.71688031 | 13.33 | -8.50 | 1.52E-06    | 0.000175929 | 0.996452014 | 12033 |

|             |       |             |       |        |             |             |             |       |
|-------------|-------|-------------|-------|--------|-------------|-------------|-------------|-------|
| RDH11       | -1.64 | -0.71713843 | 12.33 | -6.83  | 1.48E-05    | 0.000710792 | 0.966215075 | 11151 |
| RP11-11C5.2 | -1.64 | -0.71730122 | 8.98  | -6.39  | 2.88E-05    | 0.00108843  | 0.935761205 | 7240  |
| SCFD1       | -1.65 | -0.72084417 | 12.38 | -7.44  | 6.17E-06    | 0.000410561 | 0.985732783 | 11771 |
| NUSAP1      | -1.65 | -0.72230922 | 11.33 | -5.95  | 5.68E-05    | 0.00165416  | 0.879505482 | 9459  |
| KPNA2       | -1.65 | -0.72280406 | 10.56 | -5.96  | 5.62E-05    | 0.001653355 | 0.880608787 | 6806  |
| TUBB3       | -1.65 | -0.72338827 | 13.28 | -7.17  | 9.02E-06    | 0.000535502 | 0.979195087 | 14015 |
| WDR79       | -1.66 | -0.72896707 | 9.08  | -7.43  | 6.27E-06    | 0.000413248 | 0.985494194 | 14563 |
| SGOL2       | -1.66 | -0.73056874 | 8.93  | -7.37  | 6.85E-06    | 0.000446722 | 0.984155244 | 12053 |
| NUP107      | -1.66 | -0.73061195 | 10.71 | -7.13  | 9.60E-06    | 0.000556496 | 0.977891204 | 9425  |
| BRCA1       | -1.66 | -0.73113936 | 9.36  | -4.98  | 0.000284783 | 0.004701079 | 0.586987523 | 1255  |
| TTF2        | -1.66 | -0.73501797 | 10.00 | -6.50  | 2.42E-05    | 0.000976218 | 0.945521835 | 13989 |
| C11orf51    | -1.66 | -0.73542612 | 8.62  | -5.99  | 5.33E-05    | 0.001606178 | 0.886262172 | 1396  |
| HRAS        | -1.67 | -0.73637441 | 10.09 | -7.95  | 3.12E-06    | 0.000254308 | 0.992760747 | 5697  |
| TROAP       | -1.67 | -0.73714893 | 8.77  | -6.75  | 1.67E-05    | 0.000767997 | 0.961950588 | 13883 |
| CDCA3       | -1.67 | -0.73717251 | 9.68  | -5.86  | 6.56E-05    | 0.001808249 | 0.863261902 | 2519  |
| PKP2        | -1.67 | -0.73861281 | 9.40  | -8.32  | 1.92E-06    | 0.000203123 | 0.99553789  | 10135 |
| TACC3       | -1.67 | -0.74008288 | 8.95  | -7.20  | 8.67E-06    | 0.000524505 | 0.980009634 | 13058 |
| BUB1        | -1.67 | -0.74140602 | 10.28 | -5.00  | 0.000273929 | 0.004581402 | 0.596509358 | 1328  |
| RACGAP1     | -1.67 | -0.74163792 | 10.01 | -7.23  | 8.35E-06    | 0.000513814 | 0.980720344 | 10955 |
| DCP2        | -1.67 | -0.74217091 | 10.14 | -6.59  | 2.12E-05    | 0.000909541 | 0.951953791 | 3387  |
| KIF4A       | -1.67 | -0.74316121 | 8.93  | -4.56  | 0.000596098 | 0.007804534 | 0.402074435 | 6742  |
| EXOC6       | -1.68 | -0.74872342 | 9.36  | -5.83  | 6.90E-05    | 0.001875588 | 0.857043135 | 4245  |
| SERPINA3    | -1.68 | -0.74989856 | 15.20 | -4.21  | 0.001120864 | 0.011847914 | 0.262202107 | 11952 |
| ACACA       | -1.68 | -0.75042658 | 10.69 | -4.05  | 0.001484158 | 0.014364125 | 0.211275387 | 101   |
| MKNK2       | -1.68 | -0.75042793 | 8.26  | -9.37  | 5.24E-07    | 9.40E-05    | 0.998767494 | 8482  |
| RHOB        | -1.68 | -0.75080272 | 11.65 | -5.19  | 0.000199304 | 0.003743816 | 0.671209528 | 11264 |
| S100A4      | -1.68 | -0.75099689 | 10.07 | -3.26  | 0.006516619 | 0.039179341 | 0.057659641 | 11688 |
| SLC2A14     | -1.69 | -0.75324541 | 9.02  | -4.79  | 0.000397323 | 0.00588957  | 0.503475756 | 12275 |
| TMED10P     | -1.69 | -0.75531257 | 12.74 | -6.03  | 5.03E-05    | 0.001545746 | 0.892093106 | 13436 |
| NA          | -1.69 | -0.75596435 | 12.19 | -5.60  | 9.94E-05    | 0.002390578 | 0.805396219 | 13325 |
| CKS1B       | -1.69 | -0.75753184 | 12.71 | -5.27  | 0.000173321 | 0.003406783 | 0.701710361 | 2778  |
| ODC1        | -1.69 | -0.75756151 | 12.94 | -7.27  | 7.83E-06    | 0.000490478 | 0.98191471  | 9491  |
| HEATR1      | -1.69 | -0.76009062 | 11.21 | -5.51  | 0.000115326 | 0.002633342 | 0.780588833 | 5458  |
| KIAA0101    | -1.69 | -0.76022346 | 12.29 | -5.17  | 0.000204156 | 0.00379292  | 0.665799358 | 6571  |
| ZNF342      | -1.70 | -0.7632291  | 9.28  | -7.28  | 7.82E-06    | 0.000490478 | 0.98194965  | 15000 |
| ILF3        | -1.70 | -0.76483303 | 10.05 | -7.09  | 1.02E-05    | 0.00057911  | 0.976573532 | 6304  |
| KIF11       | -1.70 | -0.76625154 | 9.72  | -4.45  | 0.000726185 | 0.008897576 | 0.35516017  | 6719  |
| PHF14       | -1.70 | -0.7670237  | 10.42 | -9.13  | 6.94E-07    | 0.00010589  | 0.998372187 | 9977  |
| CKS2        | -1.70 | -0.76734152 | 13.53 | -8.00  | 2.90E-06    | 0.000242645 | 0.993275385 | 2779  |
| NA          | -1.70 | -0.76746391 | 10.03 | -3.68  | 0.002935074 | 0.022889013 | 0.119097462 | 7070  |
| TXNRD1      | -1.70 | -0.76860518 | 10.82 | -4.07  | 0.001421943 | 0.013974803 | 0.21854381  | 14070 |
| TNFRSF19    | -1.70 | -0.76961593 | 12.45 | -8.01  | 2.87E-06    | 0.000242645 | 0.993331413 | 13650 |
| C1orf116    | -1.70 | -0.76975701 | 8.26  | -4.21  | 0.001102544 | 0.011711073 | 0.265428496 | 1677  |
| SEC61A2     | -1.71 | -0.77115123 | 8.88  | -10.74 | 1.14E-07    | 3.56E-05    | 0.999722249 | 11867 |
| MCM4        | -1.71 | -0.77253225 | 11.25 | -6.54  | 2.28E-05    | 0.000955817 | 0.948513286 | 8266  |
| NUP35       | -1.71 | -0.77605004 | 9.56  | -8.15  | 2.37E-06    | 0.00023194  | 0.994485674 | 9435  |
| C1orf112    | -1.71 | -0.77632326 | 9.20  | -6.81  | 1.52E-05    | 0.000723237 | 0.965213799 | 1675  |
| G6PD        | -1.71 | -0.77709855 | 9.29  | -5.42  | 0.000134891 | 0.002873589 | 0.75212483  | 4888  |
| CDC2        | -1.71 | -0.77714679 | 9.67  | -4.38  | 0.000813433 | 0.009595746 | 0.329363464 | 2481  |
| BRI3BP      | -1.71 | -0.77756225 | 9.78  | -7.03  | 1.11E-05    | 0.000611737 | 0.974434618 | 1273  |
| UCHL5IP     | -1.71 | -0.77768459 | 10.17 | -6.53  | 2.33E-05    | 0.000967809 | 0.947343278 | 14198 |
| SUZ12       | -1.72 | -0.77970831 | 11.55 | -8.08  | 2.60E-06    | 0.000237781 | 0.993950592 | 13019 |

|           |       |             |       |        |             |             |             |       |
|-----------|-------|-------------|-------|--------|-------------|-------------|-------------|-------|
| SPC25     | -1.72 | -0.78155413 | 9.31  | -5.18  | 0.000202981 | 0.003780297 | 0.667101756 | 12688 |
| RDH11     | -1.72 | -0.78623067 | 10.76 | -7.10  | 1.00E-05    | 0.000575572 | 0.976886149 | 11150 |
| C14orf80  | -1.73 | -0.78675687 | 9.21  | -5.44  | 0.000130458 | 0.002814723 | 0.758396851 | 1519  |
| PSMC3IP   | -1.73 | -0.78967257 | 8.59  | -8.03  | 2.78E-06    | 0.000242645 | 0.993550917 | 10679 |
| CTSL2     | -1.73 | -0.79026245 | 8.98  | -6.06  | 4.75E-05    | 0.001508539 | 0.89755129  | 3236  |
| C9orf21   | -1.73 | -0.79090719 | 9.53  | -8.49  | 1.53E-06    | 0.000175929 | 0.996426242 | 2063  |
| CENPA     | -1.73 | -0.79164262 | 9.13  | -4.96  | 0.000294036 | 0.004807004 | 0.579103727 | 2589  |
| FEN1      | -1.74 | -0.79668799 | 9.50  | -7.35  | 7.05E-06    | 0.00045734  | 0.983713031 | 4583  |
| CDC2      | -1.74 | -0.79815174 | 11.55 | -4.10  | 0.001368805 | 0.013592699 | 0.225160162 | 2480  |
| KIF11     | -1.74 | -0.79841614 | 10.27 | -4.83  | 0.000370726 | 0.005582119 | 0.521017159 | 6718  |
| WBSR22    | -1.74 | -0.80071316 | 10.06 | -6.18  | 3.98E-05    | 0.001316935 | 0.912864231 | 14488 |
| RFTN1     | -1.74 | -0.80206598 | 8.38  | -4.51  | 0.00064967  | 0.00823777  | 0.381337845 | 11216 |
| MCM7      | -1.75 | -0.80621754 | 12.72 | -4.57  | 0.000581044 | 0.007693289 | 0.408311111 | 8270  |
| TMED10    | -1.75 | -0.8062313  | 9.88  | -5.27  | 0.00017391  | 0.003407056 | 0.700988413 | 13435 |
| FBXO5     | -1.75 | -0.80634339 | 9.62  | -5.83  | 6.85E-05    | 0.00187337  | 0.8578554   | 4545  |
| TIPIN     | -1.75 | -0.80719847 | 9.49  | -6.34  | 3.08E-05    | 0.001130534 | 0.931380088 | 13381 |
| ALDH3A1   | -1.75 | -0.8097262  | 8.73  | -2.89  | 0.013053563 | 0.062396111 | 0.030015474 | 402   |
| MAD2L1    | -1.75 | -0.81099816 | 11.44 | -5.63  | 9.46E-05    | 0.002346391 | 0.813028499 | 8036  |
| MAPK9     | -1.77 | -0.82009342 | 9.74  | -7.96  | 3.04E-06    | 0.000250796 | 0.992936348 | 8159  |
| KIF23     | -1.77 | -0.82229405 | 9.18  | -6.86  | 1.43E-05    | 0.000696133 | 0.967305086 | 6734  |
| ITGB2     | -1.77 | -0.82284951 | 9.36  | -3.49  | 0.004188165 | 0.029010936 | 0.086630952 | 6431  |
| ISY1      | -1.77 | -0.8230398  | 9.17  | -10.29 | 1.85E-07    | 5.52E-05    | 0.99955722  | 6411  |
| FZD6      | -1.77 | -0.82389516 | 8.93  | -6.86  | 1.43E-05    | 0.000696133 | 0.967379115 | 4875  |
| EXO1      | -1.77 | -0.82399251 | 9.26  | -7.21  | 8.59E-06    | 0.000522308 | 0.980170578 | 4235  |
| MELK      | -1.77 | -0.82435061 | 11.12 | -7.76  | 4.02E-06    | 0.000301982 | 0.990678357 | 8331  |
| E2F7      | -1.77 | -0.82444234 | 8.69  | -6.98  | 1.20E-05    | 0.000636127 | 0.97250405  | 3893  |
| TPX2      | -1.77 | -0.82610106 | 10.20 | -5.57  | 0.000104717 | 0.00246109  | 0.796911583 | 13766 |
| PSMC3IP   | -1.77 | -0.82760076 | 8.96  | -6.51  | 2.38E-05    | 0.000971023 | 0.946349557 | 10680 |
| PAK1IP1   | -1.78 | -0.82854898 | 11.04 | -6.71  | 1.76E-05    | 0.000798558 | 0.959830641 | 9655  |
| CKS1B     | -1.78 | -0.82857707 | 12.20 | -5.85  | 6.72E-05    | 0.0018471   | 0.860254112 | 2777  |
| DHCR24    | -1.78 | -0.82937917 | 10.72 | -4.86  | 0.000350306 | 0.005380887 | 0.535327498 | 3533  |
| BXDC2     | -1.78 | -0.8306938  | 11.88 | -6.90  | 1.34E-05    | 0.000667525 | 0.969210403 | 1338  |
| CDC45L    | -1.78 | -0.83193745 | 10.63 | -4.16  | 0.001221052 | 0.012484979 | 0.2458583   | 2513  |
| ITGB2     | -1.78 | -0.83349971 | 9.15  | -3.82  | 0.002274913 | 0.01901329  | 0.148545468 | 6432  |
| LOC389137 | -1.78 | -0.8340358  | 8.90  | -10.14 | 2.17E-07    | 5.92E-05    | 0.999480689 | 7167  |
| CENPA     | -1.78 | -0.83435159 | 9.91  | -4.54  | 0.000614433 | 0.00794233  | 0.394729443 | 2588  |
| ZWINT     | -1.78 | -0.83510753 | 9.91  | -5.41  | 0.000136045 | 0.002886081 | 0.750508614 | 15245 |
| SDC4      | -1.78 | -0.83576977 | 10.36 | -5.44  | 0.000130239 | 0.002814723 | 0.758709011 | 11812 |
| CENPF     | -1.79 | -0.83664648 | 9.63  | -6.04  | 4.92E-05    | 0.001532269 | 0.894174902 | 2594  |
| KRT19     | -1.79 | -0.83695321 | 13.27 | -3.33  | 0.005670838 | 0.035449711 | 0.065601726 | 6826  |
| BCAS1     | -1.79 | -0.83924759 | 8.32  | -6.52  | 2.37E-05    | 0.000968877 | 0.946600555 | 1132  |
| CCNF      | -1.79 | -0.84213271 | 10.32 | -7.43  | 6.29E-06    | 0.000413248 | 0.985458278 | 2379  |
| JUN       | -1.80 | -0.85011094 | 11.49 | -3.68  | 0.002931804 | 0.022889013 | 0.119214397 | 6493  |
| C18orf17  | 1.81  | -0.85528127 | 11.48 | -4.71  | 0.000451724 | 0.006469614 | 0.471008955 | 1611  |
| ATF5      | -1.81 | -0.85553073 | 10.21 | -8.11  | 2.50E-06    | 0.000232895 | 0.994180387 | 889   |
| MELK      | -1.81 | -0.85629235 | 10.08 | -8.25  | 2.08E-06    | 0.000212947 | 0.995161532 | 8332  |
| SFN       | -1.81 | -0.85840588 | 10.52 | -3.43  | 0.00470205  | 0.031360022 | 0.077951125 | 12005 |
| FDFT1     | -1.82 | -0.86029844 | 13.69 | -5.99  | 5.36E-05    | 0.001611284 | 0.885734348 | 4574  |
| SPP1      | -1.82 | -0.86535021 | 14.19 | -6.00  | 5.27E-05    | 0.001599542 | 0.887290085 | 12727 |
| WEE1      | -1.82 | -0.86663724 | 10.11 | -8.93  | 8.91E-07    | 0.000123548 | 0.997916018 | 14573 |
| CHCHD3    | -1.83 | -0.86854374 | 9.33  | -9.28  | 5.80E-07    | 0.000100794 | 0.998636781 | 2672  |
| GINS2     | -1.83 | -0.86862425 | 11.20 | -4.04  | 0.001528961 | 0.014676676 | 0.206334007 | 5046  |

|          |       |             |       |        |             |             |             |       |
|----------|-------|-------------|-------|--------|-------------|-------------|-------------|-------|
| DUSP1    | -1.83 | -0.86906358 | 11.35 | -4.77  | 0.000407444 | 0.005987233 | 0.497103831 | 3827  |
| DEPDC1   | -1.83 | -0.87248667 | 8.94  | -8.19  | 2.27E-06    | 0.000227992 | 0.994717523 | 3496  |
| HMMR     | -1.83 | -0.8740669  | 11.11 | -4.78  | 0.000399269 | 0.005907772 | 0.50223825  | 5612  |
| CAMTA1   | -1.83 | -0.87440825 | 8.43  | -7.97  | 3.04E-06    | 0.000250796 | 0.992950253 | 2151  |
| PLA2G2A  | -1.84 | -0.87853686 | 12.47 | -4.17  | 0.001202942 | 0.012389245 | 0.248660081 | 10141 |
| SMC4     | -1.84 | -0.87987372 | 10.69 | -7.48  | 5.84E-06    | 0.000396122 | 0.986474698 | 12457 |
| NUSAP1   | -1.85 | -0.8844338  | 10.11 | -7.57  | 5.19E-06    | 0.000359844 | 0.987977681 | 9460  |
| RPS7     | 1.85  | -0.88684773 | 11.34 | -4.42  | 0.000766491 | 0.009220263 | 0.342759958 | 11589 |
| FAM83D   | -1.86 | -0.89295792 | 10.75 | -7.16  | 9.20E-06    | 0.000543624 | 0.978802075 | 4442  |
| PLAGL2   | -1.86 | -0.8929934  | 10.62 | -7.19  | 8.84E-06    | 0.000530928 | 0.979608809 | 10153 |
| CDT1     | -1.86 | -0.89392016 | 10.20 | -6.01  | 5.21E-05    | 0.00158309  | 0.888535526 | 2570  |
| ELF3     | -1.86 | -0.89698882 | 8.59  | -7.66  | 4.58E-06    | 0.000326743 | 0.989374198 | 4058  |
| CDH1     | -1.86 | -0.89844806 | 10.30 | -4.31  | 0.000927382 | 0.010423987 | 0.300812898 | 2526  |
| PBK      | -1.86 | -0.89902021 | 10.31 | -4.94  | 0.000304563 | 0.004920254 | 0.570384722 | 9732  |
| ANLN     | -1.87 | -0.90538153 | 10.17 | -7.25  | 8.09E-06    | 0.000501162 | 0.98132002  | 556   |
| C1orf181 | -1.87 | -0.90566331 | 10.46 | -11.75 | 4.07E-08    | 1.88E-05    | 0.999897006 | 1698  |
| CKS2     | -1.87 | -0.90628771 | 12.87 | -6.64  | 1.96E-05    | 0.000868392 | 0.955426733 | 2780  |
| RFC3     | -1.87 | -0.90638515 | 10.16 | -7.89  | 3.35E-06    | 0.000266374 | 0.992216885 | 11199 |
| PRC1     | -1.88 | -0.90725712 | 11.24 | -5.97  | 5.50E-05    | 0.001638803 | 0.88295751  | 10496 |
| ID2      | -1.88 | -0.91323042 | 11.07 | -5.92  | 5.96E-05    | 0.001705581 | 0.87428529  | 6174  |
| RPS24    | -1.90 | -0.92277696 | 12.00 | -5.46  | 0.000126588 | 0.002769779 | 0.763954805 | 11545 |
| SLC44A3  | -1.90 | -0.92330128 | 9.63  | -6.82  | 1.51E-05    | 0.000721339 | 0.965408508 | 12368 |
| MCM10    | -1.90 | -0.92333414 | 10.73 | -6.14  | 4.21E-05    | 0.001363259 | 0.908234925 | 8259  |
| FEN1     | -1.90 | -0.92390146 | 11.55 | -7.32  | 7.35E-06    | 0.000469309 | 0.983008541 | 4584  |
| RPS7     | -1.90 | -0.92927212 | 10.97 | -5.39  | 0.000141682 | 0.002960377 | 0.742709816 | 11588 |
| BRMS1L   | -1.90 | -0.9294345  | 10.64 | -9.21  | 6.35E-07    | 0.000101891 | 0.998510464 | 1278  |
| PGC      | -1.91 | -0.93715765 | 10.23 | -2.87  | 0.013650875 | 0.064440945 | 0.028773077 | 9941  |
| LDLR     | -1.92 | -0.93850442 | 12.84 | -4.34  | 0.000870968 | 0.009971547 | 0.314302993 | 6924  |
| ALDH7A1  | -1.92 | -0.93926212 | 11.76 | -7.92  | 3.23E-06    | 0.000259518 | 0.992495058 | 415   |
| DNAJC13  | -1.93 | -0.9484653  | 8.41  | -9.94  | 2.71E-07    | 6.79E-05    | 0.999354534 | 3696  |
| NSDHL    | -1.93 | -0.94911118 | 10.93 | -8.43  | 1.66E-06    | 0.000182159 | 0.996134479 | 9339  |
| DEFB1    | -1.93 | -0.95057338 | 8.89  | -4.77  | 0.000406323 | 0.005976514 | 0.497801842 | 3481  |
| RPL29    | -1.94 | -0.95234227 | 10.82 | -6.92  | 1.30E-05    | 0.000660278 | 0.970085553 | 11468 |
| THBS1    | -1.94 | -0.95328025 | 11.71 | -4.60  | 0.000553066 | 0.007479621 | 0.420428324 | 13313 |
| BIRC5    | -1.94 | -0.95351753 | 11.53 | -5.60  | 9.96E-05    | 0.002392782 | 0.804998361 | 1205  |
| RPL36A   | -1.94 | -0.95776392 | 8.62  | -9.08  | 7.40E-07    | 0.000109229 | 0.998265891 | 11484 |
| G6PD     | -1.94 | -0.95854186 | 11.26 | -6.46  | 2.58E-05    | 0.001013207 | 0.942121617 | 4889  |
| PAWR     | -1.94 | -0.9588647  | 10.91 | -7.07  | 1.05E-05    | 0.000589508 | 0.975895744 | 9727  |
| DLG7     | -1.95 | -0.96005182 | 10.18 | -5.96  | 5.57E-05    | 0.001649778 | 0.881638043 | 3638  |
| HMMR     | -1.95 | -0.96356286 | 10.86 | -5.43  | 0.00013143  | 0.002827502 | 0.757012757 | 5613  |
| SNORD16  | -1.95 | -0.9643981  | 8.95  | -8.01  | 2.86E-06    | 0.000242645 | 0.993368114 | 12522 |
| NCAPG    | -1.96 | -0.9706444  | 10.64 | -9.06  | 7.63E-07    | 0.000110775 | 0.998213735 | 8973  |
| C18orf24 | -1.96 | -0.97260017 | 9.36  | -7.14  | 9.43E-06    | 0.000550917 | 0.978274499 | 1615  |
| SC4MOL   | -1.96 | -0.97428809 | 11.12 | -5.05  | 0.000252839 | 0.004338076 | 0.615908579 | 11744 |
| AASDHPPT | -1.97 | -0.97616028 | 9.43  | -11.21 | 6.97E-08    | 2.42E-05    | 0.999827614 | 21    |
| DHCR7    | -1.98 | -0.98416102 | 10.32 | -6.12  | 4.38E-05    | 0.001403039 | 0.904855019 | 3535  |
| FDFT1    | -1.98 | -0.98635706 | 12.24 | -5.64  | 9.36E-05    | 0.002328258 | 0.814783817 | 4573  |
| ADAM10   | -1.98 | -0.98885321 | 9.31  | -6.75  | 1.68E-05    | 0.000769973 | 0.961677126 | 213   |
| MRS2     | -1.99 | -0.99222264 | 9.99  | -8.51  | 1.50E-06    | 0.00017587  | 0.996507548 | 8708  |
| ACAT2    | -1.99 | -0.99633741 | 12.06 | -5.24  | 0.000181184 | 0.003509885 | 0.692197925 | 118   |
| ATF3     | -2.00 | -0.99682923 | 9.02  | -8.56  | 1.40E-06    | 0.000165821 | 0.996731106 | 886   |
| S100A3   | -2.00 | -0.99959177 | 9.74  | -3.04  | 0.009917629 | 0.05187709  | 0.038898796 | 11686 |

|         |       |             |       |        |             |             |             |       |
|---------|-------|-------------|-------|--------|-------------|-------------|-------------|-------|
| CRYAA   | -2.00 | -1.00080751 | 12.57 | -6.96  | 1.23E-05    | 0.000640525 | 0.971850972 | 3111  |
| BCAS1   | -2.01 | -1.00371564 | 8.61  | -6.24  | 3.60E-05    | 0.001247082 | 0.920650604 | 1133  |
| AURKB   | -2.01 | -1.00373187 | 10.45 | -5.32  | 0.000158816 | 0.003224666 | 0.719944499 | 1037  |
| CD24    | -2.01 | -1.00399285 | 10.59 | -6.89  | 1.36E-05    | 0.00066814  | 0.968887557 | 2429  |
| HSPA14  | -2.01 | -1.00563205 | 10.25 | -9.22  | 6.27E-07    | 0.000101891 | 0.998528358 | 6111  |
| ADM     | -2.01 | -1.00924984 | 11.41 | -4.91  | 0.00031983  | 0.005092242 | 0.558191012 | 263   |
| DHCR7   | -2.02 | -1.01545158 | 10.43 | -4.73  | 0.000438992 | 0.006299097 | 0.47822973  | 3534  |
| SYPL1   | -2.02 | -1.01677282 | 11.56 | -8.93  | 8.88E-07    | 0.000123548 | 0.997922957 | 13039 |
| HIF1AN  | -2.03 | -1.01794639 | 9.28  | -8.61  | 1.32E-06    | 0.000160393 | 0.996910521 | 5517  |
| CDCA8   | -2.03 | -1.01873289 | 9.79  | -7.70  | 4.32E-06    | 0.000318391 | 0.989981577 | 2525  |
| DNAJB1  | -2.03 | -1.020467   | 10.73 | -8.34  | 1.85E-06    | 0.000197735 | 0.995685691 | 3672  |
| GTSE1   | -2.04 | -1.02908671 | 9.03  | -6.53  | 2.31E-05    | 0.000963246 | 0.94799199  | 5369  |
| NDC80   | -2.04 | -1.03051706 | 9.76  | -6.20  | 3.85E-05    | 0.001294673 | 0.915439541 | 9003  |
| DTNA    | -2.05 | -1.03386885 | 8.95  | -8.50  | 1.52E-06    | 0.000175929 | 0.996448054 | 3811  |
| SYTL2   | -2.05 | -1.03441133 | 8.33  | -4.89  | 0.00033059  | 0.005176023 | 0.549902036 | 13050 |
| TNFAIP8 | -2.05 | -1.03670934 | 9.38  | -6.22  | 3.73E-05    | 0.001277808 | 0.91793813  | 13640 |
| RPL29   | -2.07 | -1.05048714 | 10.87 | -7.03  | 1.12E-05    | 0.000611737 | 0.974341178 | 11469 |
| NEK2    | -2.07 | -1.05230469 | 10.86 | -5.61  | 9.90E-05    | 0.002385871 | 0.80596053  | 9077  |
| KIF2C   | -2.07 | -1.05249923 | 9.79  | -5.95  | 5.71E-05    | 0.001654459 | 0.87906585  | 6737  |
| CHAF1B  | -2.08 | -1.05691833 | 9.46  | -7.39  | 6.61E-06    | 0.00043298  | 0.984704055 | 2668  |
| DNMT3B  | -2.08 | -1.0593043  | 8.55  | -9.73  | 3.44E-07    | 7.39E-05    | 0.999185651 | 3727  |
| ID3     | -2.09 | -1.06139894 | 11.69 | -3.49  | 0.004221804 | 0.029164483 | 0.086003389 | 6176  |
| SQLE    | -2.10 | -1.06832005 | 12.22 | -6.73  | 1.73E-05    | 0.000783815 | 0.960665388 | 12756 |
| UHRF1   | -2.10 | -1.06856679 | 11.80 | -7.68  | 4.49E-06    | 0.000324625 | 0.989594666 | 14243 |
| UBE2C   | -2.12 | -1.08083397 | 11.20 | -6.40  | 2.82E-05    | 0.001077665 | 0.936964115 | 14114 |
| RPS15   | -2.13 | -1.0903866  | 10.15 | -5.40  | 0.000138235 | 0.00291631  | 0.747460363 | 11531 |
| RASD1   | -2.14 | -1.09609188 | 11.70 | -3.94  | 0.001820477 | 0.016430609 | 0.179089501 | 11036 |
| SLC2A8  | -2.15 | -1.10422779 | 11.30 | -6.50  | 2.41E-05    | 0.000974785 | 0.945736324 | 12280 |
| FASN    | -2.15 | -1.10696142 | 13.46 | -5.97  | 5.53E-05    | 0.001642876 | 0.882491662 | 4482  |
| UBE2C   | -2.16 | -1.10959146 | 11.65 | -5.89  | 6.22E-05    | 0.001747231 | 0.869441294 | 14113 |
| CYP24A1 | -2.16 | -1.11098164 | 10.75 | -3.47  | 0.004374082 | 0.029838049 | 0.083273766 | 3315  |
| TRIP13  | -2.16 | -1.11403953 | 10.78 | -8.16  | 2.35E-06    | 0.00023194  | 0.994540154 | 13870 |
| LIPG    | -2.17 | -1.11497368 | 9.36  | -5.15  | 0.000211069 | 0.003869521 | 0.658236506 | 6997  |
| SC4MOL  | -2.17 | -1.1187496  | 12.85 | -5.96  | 5.64E-05    | 0.001653355 | 0.880379395 | 11745 |
| DSC2    | -2.17 | -1.12039862 | 10.58 | -6.99  | 1.17E-05    | 0.000626227 | 0.973117478 | 3788  |
| CDCA5   | -2.18 | -1.12191923 | 11.72 | -7.79  | 3.86E-06    | 0.000292792 | 0.991049417 | 2523  |
| RRM2    | -2.18 | -1.12329086 | 9.69  | -6.22  | 3.74E-05    | 0.001277808 | 0.91776704  | 11614 |
| NEIL2   | -2.19 | -1.13004986 | 9.06  | -12.39 | 2.20E-08    | 1.29E-05    | 0.999942652 | 9071  |
| UNC93A  | -2.19 | -1.13006459 | 9.52  | -5.60  | 0.000100675 | 0.002398881 | 0.803304535 | 14260 |
| CEP55   | -2.20 | -1.13488071 | 10.44 | -7.26  | 7.97E-06    | 0.00049646  | 0.98158816  | 2628  |
| ENC1    | -2.20 | -1.1402703  | 10.55 | -5.66  | 9.07E-05    | 0.002285982 | 0.819543923 | 4091  |
| PDLIM7  | -2.23 | -1.15431562 | 9.12  | -4.71  | 0.000453599 | 0.006476697 | 0.469963659 | 9858  |
| HES4    | -2.25 | -1.17297191 | 11.61 | -6.47  | 2.55E-05    | 0.001007185 | 0.942733539 | 5489  |
| ITFG3   | -2.26 | -1.17662812 | 9.84  | -9.08  | 7.45E-07    | 0.000109229 | 0.998255009 | 6417  |
| CCNB1   | -2.29 | -1.19297857 | 10.29 | -9.39  | 5.13E-07    | 9.35E-05    | 0.99879213  | 2361  |
| HRSP12  | -2.29 | -1.19820878 | 10.13 | -8.73  | 1.14E-06    | 0.000144665 | 0.99734335  | 5703  |
| KIF20A  | -2.29 | -1.19844196 | 10.45 | -7.84  | 3.58E-06    | 0.0002784   | 0.991698325 | 6731  |
| DNMT3B  | -2.30 | -1.20176323 | 8.76  | -8.87  | 9.59E-07    | 0.000130627 | 0.997758009 | 3725  |
| ETFB    | -2.31 | -1.204925   | 9.83  | -4.02  | 0.001581109 | 0.015025955 | 0.200866295 | 4208  |
| SOCS2   | -2.33 | -1.22129785 | 9.71  | -2.82  | 0.015075817 | 0.068376875 | 0.026196281 | 12608 |
| SQLE    | -2.33 | -1.22180828 | 10.62 | -6.84  | 1.46E-05    | 0.000708392 | 0.966638156 | 12757 |
| ARHGEF3 | -2.34 | -1.22483196 | 11.69 | -9.76  | 3.33E-07    | 7.36E-05    | 0.999211483 | 725   |



|          |       |             |       |        |          |             |             |       |
|----------|-------|-------------|-------|--------|----------|-------------|-------------|-------|
| CCNA2    | -2.35 | -1.22968054 | 11.43 | -7.92  | 3.21E-06 | 0.00025898  | 0.992549816 | 2360  |
| AASDHPPT | -2.39 | -1.25750305 | 10.83 | -12.70 | 1.65E-08 | 1.09E-05    | 0.999956235 | 22    |
| KIFC1    | -2.40 | -1.26106951 | 10.13 | -8.46  | 1.59E-06 | 0.000181194 | 0.996292394 | 6746  |
| ZNF165   | -2.42 | -1.27278772 | 9.17  | -11.63 | 4.60E-08 | 1.95E-05    | 0.999884366 | 14889 |
| CDC20    | -2.44 | -1.285429   | 12.53 | -6.60  | 2.10E-05 | 0.000906948 | 0.952475364 | 2482  |
| ID11     | -2.47 | -1.30265208 | 10.79 | -6.27  | 3.44E-05 | 0.001217303 | 0.923943585 | 6185  |
| ISY1     | -2.49 | -1.31820859 | 9.40  | -17.08 | 4.95E-10 | 1.26E-06    | 0.999998154 | 6412  |
| CDKN3    | -2.50 | -1.3232119  | 10.87 | -6.66  | 1.91E-05 | 0.000845866 | 0.956668415 | 2562  |

in the
